1 A dysmorphic mouse model reveals developmental interactions of  
2 chondrocranium and dermatocranium

3

4 Susan M. Motch Perrine<sup>1,&\*</sup>

5 M. Kathleen Pitirri<sup>1,&</sup>

6 Emily L. Durham<sup>1</sup>

7 Mizuho Kawasaki<sup>1</sup>

8 Hao Zheng<sup>2</sup>

9 Danny Z. Chen<sup>2</sup>

10 Kazuhiko Kawasaki<sup>1,#</sup>

11 Joan T. Richtsmeier<sup>1,#,\*</sup>

12

13 <sup>1</sup> Department of Anthropology, Pennsylvania State University, University Park, PA 16802

14 <sup>2</sup> Department of Computer Science and Engineering, University of Notre Dame, Notre Dame, IN  
15 46556

16 & These authors contributed equally to this paper

17 # These authors contributed equally to this paper

18 \* Corresponding authors

19 Corresponding authors Email: [qzk2@psu.edu](mailto:qzk2@psu.edu) and [jta10@psu.edu](mailto:jta10@psu.edu)

20

21 **Keywords:** craniofacial development, skull, embryonic cartilage, Crouzon syndrome, FGFR

22

23

24

25

26

27

28

29

30

31 **Abstract**

32 The cranial endo- and dermal skeletons, which comprise the vertebrate skull, evolved  
33 independently over 470 million years ago and form separately during embryogenesis. In  
34 mammals, much of the cartilaginous chondrocranium is transient, undergoing endochondral  
35 ossification or disappearing, so its role in skull morphogenesis is not well studied and it remains  
36 an enigmatic structure. We provide complete three-dimensional (3D) reconstructions of the  
37 laboratory mouse chondrocranium from embryonic day 13.5 through 17.5 using a novel  
38 methodology of uncertainty-guided segmentation of phosphotungstic enhanced 3D  
39 microcomputed tomography images with sparse annotation. We evaluate the embryonic mouse  
40 chondrocranium and dermatocranium in 3D and delineate the effects of a *Fgfr2* variant on  
41 embryonic chondrocranial cartilages and on the association with forming dermal bones using  
42 the *Fgfr2c*<sup>C342Y/+</sup> Crozon syndrome mouse. We show that the dermatocranium develops  
43 outside of and in shapes that conform to the chondrocranium. Results reveal direct effects of the  
44 *Fgfr2* variant on embryonic cartilage, on chondrocranium morphology, and on the association  
45 between chondrocranium and dermatocranium development. Histologically we observe a trend  
46 of relatively more chondrocytes, larger chondrocytes, and/or more matrix in the *Fgfr2c*<sup>C342Y/+</sup>  
47 embryos at all timepoints before the chondrocranium begins to disintegrate at E16.5. The  
48 chondrocrania and forming dermatocrania of *Fgfr2c*<sup>C342Y/+</sup> embryos are relatively large, but a  
49 contrasting trend begins at E16.5 and continues into early postnatal (P0 and P2) timepoints,  
50 with the skulls of older *Fgfr2c*<sup>C342Y/+</sup> mice reduced in most dimensions compared to *Fgfr2c*<sup>+/+</sup>  
51 littermates. Our findings have implications for the study and treatment of human craniofacial  
52 disease, for understanding the impact of chondrocranial morphology on skull growth, and  
53 potentially on the evolution of skull morphology.

## 54 **Introduction**

55 The heads of modern vertebrates arose as a protective, predominantly cartilaginous assembly  
56 that surrounded the major cranial organs of early vertebrates. The emergence of the cranial  
57 endoskeleton was followed by the appearance of the cranial dermal skeleton 470 Mya or earlier  
58 (Janvier, 2015, 1993; Sansom and Andreev, 2019). The cranial endoskeleton includes the  
59 cartilaginous chondrocranium and pharyngeal skeleton that form prior to adjacent cranial dermal  
60 bones of the dermatocranium (de Beer, 1937; Kawasaki and Richtsmeier, 2017a, 2017b; Pitirri  
61 et al., 2020). Though elements of these two skeletal systems have changed drastically over  
62 evolutionary time (Janvier, 1993; Schultze, 1993; Zhu et al., 2013), their association has been  
63 maintained, excepting in Chondrichthyes who secondarily lost their dermal skeleton (Schultze,  
64 1993). Most modern vertebrate skulls are composite structures formed by the union of the endo-  
65 and dermal (exo-) cranial skeletons that form embryonically and/or evolutionarily in cartilage and  
66 bone, respectively, and evolved as distinct systems (Hirasawa and Kuratani, 2015; Jarvik, 1980;  
67 Patterson, 1977). Based on our characterization of the mouse chondrocranium as a scaffold for  
68 cranial dermal bones (Kawasaki and Richtsmeier, 2017a), we test the hypothesis that prenatal  
69 development of the chondrocranium and dermatocranium of modern mammals is integrated by  
70 analyzing this relationship in a mouse model for a human craniofacial disease. We propose that  
71 chondrocranial morphology affects formation of cranial dermal bones until cartilages dissolve or  
72 are mineralized endochondrally.

73 Elements of the mouse chondrocranium form individually in sequence beginning at  
74 embryonic day 12.5 (E12.5), fuse to provide an intricate protective covering for the brain and  
75 other sense organs, and parts of these elements begin to dissolve by E16.5 (Pitirri et al., 2020).  
76 Though many chondrocranial elements are transient, no modern vertebrate species has lost the  
77 chondrocranium during evolution suggesting its essential role in skull development (Kawasaki  
78 and Richtsmeier, 2017a). Observed variation in chondrocranial anatomy across species (de  
79 Beer, 1937) indicates its contribution to phylogenetic differences in skull morphology. Dermal

80 bones of the skull arise individually in association with chondrocranial cartilages (Kawasaki and  
81 Richtsmeier, 2017a; Pitirri et al., 2020) but are ultimately joined with other bones by sutures that  
82 serve as essential sites of bone formation and growth (Opperman, 2000). During growth,  
83 mesenchyme of the suture keeps adjacent bones separated while osteoprogenitor  
84 mesenchymal cells within the osteogenic fronts of these bones proliferate and differentiate into  
85 osteoblasts that mineralize osteoid by intramembranous ossification (Farmer et al., 2021;  
86 Holmes et al., 2021; Iseki et al., 1997; Opperman, 2000). In craniosynostosis, a condition that  
87 always involves premature fusion of cranial suture(s) and can include additional postcranial and  
88 craniofacial anomalies, osteoblasts mineralize the suture before the completion of brain growth,  
89 alter subsequent growth patterns of cranial dermal bone, and produce abnormal head shapes  
90 (Flaherty et al., 2016).

91         Approximately 1 in 2,000–2,500 children of all ethnic groups are born with  
92 craniosynostosis conditions (Heuzé et al., 2014; Lajeunie et al., 2006) and though variants of  
93 many genes are associated with these disorders (Cuellar et al., 2020; Genomics England  
94 Research Consortium et al., 2020; Goos and Mathijssen, 2019; Holmes et al., 2021; Justice et  
95 al., 2012; Maruyama et al., 2021; Wilkie, 1997; Wilkie et al., 2001), alteration to the function of  
96 fibroblast growth factor receptor 2 (FGFR2) results in the more common craniosynostosis  
97 syndromes of Apert, Crouzon, and Pfeiffer. Though nearly all individuals affected with each of  
98 these syndromes have premature suture closure, the distinctive set of nonsutural phenotypes  
99 that comprise each syndrome depicts craniosynostosis as a complex growth disorder affecting  
100 multiple cranial tissues whose development is targeted by variants in ways that remain poorly  
101 understood (Flaherty et al., 2016).

102         Because humans share key developmental mechanisms with most other mammals,  
103 mouse models for the more common craniosynostosis syndromes have provided an  
104 experimental system for the study of aberrant genetic signaling in embryonic craniofacial  
105 development. The *Fgfr2*<sup>C342Y/+</sup> Crouzon syndrome mouse model (Eswarakumar et al., 2004)

106 carries a cysteine to tyrosine substitution at amino acid 342 (Cys342Tyr; C342Y) in the protein  
107 encoded by *Fgfr2c* equivalent to the FGFR2 variant common to Pfeiffer and Crouzon  
108 syndromes (Eswarakumar et al., 2004; Oldridge et al., 1995; Reardon et al., 1994; Rutland et  
109 al., 1995). The FGFR2c C342Y variant is associated with constitutive activation of the receptor  
110 that increases osteoblast proliferation (Eswarakumar et al., 2004), may affect osteoblast  
111 differentiation at different stages of development (Liu et al., 2013; Miraoui et al., 2009), and is  
112 associated with craniofacial dysmorphogenesis and premature fusion of the coronal suture,  
113 typically prenatally. In mice, *Fgfr2c* is required for normal function of osteoblast lineage cells and  
114 interacts with *Fgfr3*, important to cells in the chondrocyte lineage during endochondral  
115 osteogenesis (Eswarakumar et al., 2004, 2002).

116         The established explanation for cranial dysmorphogenesis in craniosynostosis  
117 syndromes is that premature closure of sutures results in changes in growth trajectories local to  
118 sutures of the growing skull (Johnson and Wilkie, 2011). Suture closure is considered the  
119 primary insult, initiating changes in growth patterns and increased intracranial pressure that can  
120 harm the brain and other cranial organs. Under this hypothesis, research into mechanism  
121 underlying craniosynostosis has focused primarily on how changes in genetic regulation affect  
122 osteoblast function, dermal bone formation, and mineralization of cranial suture mesenchyme,  
123 while typical therapies involve corrective and/or reconstructive surgery to adjust the size, shape,  
124 and position of skull bones to improve appearance and function. The recent definition of sutures  
125 as a mesenchymal stem cell niche (Maruyama et al., 2016; Park et al., 2016; Zhao et al., 2015)  
126 provides a potential alternative approach to correcting closed sutures by combining  
127 biodegradable materials with mesenchymal stem cells to regenerate functional cranial sutures  
128 (Yu et al., 2021). However, skulls of mice carrying specific *Fgfr2* variants are dysmorphic prior to  
129 suture closure (Motch Perrine et al., 2014), cranial tissues other than bone are dysmorphic in  
130 these mice at birth (Holmes et al., 2018; Martínez-Abadías et al., 2013; Motch Perrine et al.,  
131 2017; Peskett et al., 2017), and a diversity of cell types are identified within the embryonic

132 murine coronal suture by single cell transcriptome analysis (Farmer et al., 2021; Holmes et al.,  
133 2021). Investigation of the effect of aberrant FGF/FGFR signaling on the function of a variety of  
134 cranial cells and tissues is required to fully understand the pathogenesis of craniosynostosis  
135 conditions. The unique capacity of cartilage to grow interstitially enabling rapid, continuous  
136 growth in size and change in shape ensures customized protection for embryonic cranial organs  
137 prior to bone formation, and the established association between cranial cartilage and  
138 endochondral bone confirms the importance of chondrocranial elements to skull shape. Though  
139 not as extensively studied, the demonstrated temporo-spatial association between specific  
140 cranial cartilages and individual dermal bones during embryogenesis (Kawasaki and  
141 Richtsmeier, 2017a; Pitirri et al., 2020) suggests the potential for the chondrocranium to  
142 influence the position, size, shape, and development of dermal bones.

143 Our goal is to elucidate the developmental relationship between the chondrocranium and  
144 dermatocranium in *Fgfr2c*<sup>C342Y/+</sup> mice whose skull phenotype parallels that of humans with  
145 Crouzon/Pfeiffer syndrome with known deviation in FGF/FGFR signaling (Eswarakumar et al.,  
146 2004; Martínez-Abadías et al., 2013; Perlyn et al., 2006; Snyder-Warwick et al., 2010). The  
147 impact of this research is twofold: 1) the samples and novel methods for embryonic cartilage  
148 visualization (Lesciotto et al., 2020) and deep learning based segmentation using uncertainty-  
149 guided self-training with very sparse annotation (Zheng et al., 2020) allow us to address  
150 questions inaccessible in the study of humans but inform us about human craniofacial  
151 development and disease process; and 2) our 3D morphological analyses provide a unique  
152 opportunity for innovative evaluation of the effect of a variant on embryonic cranial cartilage  
153 formation and on the relationship between chondrocranial cartilage and dermal bone formation.  
154 Since it is known that the prenatal dermatocranium is dysmorphic in these mice, three outcomes  
155 are possible: i) chondrocranial morphology of *Fgfr2c*<sup>C342Y/+</sup> mice and their controls (*Fgfr2c*<sup>+/+</sup>  
156 littermates) is similar indicating that the variant affects the cranial osteoblast lineage but not the  
157 chondrocyte series; ii) chondrocranial morphology separates *Fgfr2c*<sup>C342Y/+</sup> and *Fgfr2c*<sup>+/+</sup>

158 littermates but there is a lack of correspondence in the morphological effects on the  
159 dermatocranium and the chondrocranium indicating that the variant affects the chondrocyte  
160 series and the osteoblast lineage variant but that the two cranial skeletons are dissociated; or iii)  
161 chondrocranial morphology differs between genotypes and the morphological effects of the  
162 variant on chondrocranial cartilages and dermatocranial bone show correspondence, indicating  
163 integration of chondrocranial and dermatocranial development. Our analyses provide new data  
164 about the role of the chondrocranium in dermatocranium development in craniosynostosis and  
165 by extension, in normal development.

166

## 167 **Results**

### 168 ***Segmentation and visualization of embryonic mouse cranial bone and cartilage in 3D***

169 Embryonic bone was segmented from 3D microCT images by thresholding techniques using  
170 Avizo 2020.2 (ThermoFisher Scientific, Waltham, MA), but segmenting embryonic cranial  
171 cartilage using deep learning based, fully convolutional networks (FCNs) (Long et al., 2015;  
172 Ronneberger et al., 2015; Zheng et al., 2019) remains a challenging task. The difficulty involves  
173 a combined cadre of conditions including significant topological variation across cranial  
174 cartilages, large-size image volumes ( $\bar{X} \approx 1300 \times 1700 \times 2000$  voxels), extremely thin regions-of-  
175 interest (ROIs), and unobtainability of voxel-wise annotation of whole volumes for network  
176 training. Our goal was to enable automated segmentation over developmental time, but full  
177 annotation (i.e., labeling all ROIs in a sufficient number of whole 3D volumes) for training deep  
178 learning based, FCN models for chondrocranium segmentation is impractical. The reasons  
179 include large image size necessary to capture biological complexity, substantial changes in  
180 corresponding anatomical regions across developmental time and genotypes, and the need for  
181 sample sizes adequate to achieve statistical power. Consequently, a new two-phase approach  
182 implementing sparse annotation was used for training our segmentation model. The two-phase  
183 approach involves automatic segmentation of the chondrocranium with very sparse annotation

184 to bridge the performance gap relative to full annotation and integration of limited human  
185 corrections to fine-tune the model. Our two-phase approach ([https://github.com/ndcse-](https://github.com/ndcse-medical/CartSeg_UGST)  
186 [medical/CartSeg\\_UGST](https://github.com/ndcse-medical/CartSeg_UGST)) is built on an automatic segmentation procedure (Zheng et al., 2020)  
187 that produced fully 3D reconstructions of the chondrocranium from embryonic day 13.5 (E13.5)  
188 through E17.5 for *Fgfr2c*<sup>C342Y/+</sup> mice and their *Fgfr2c*<sup>+/+</sup> littermates (Fig. 1; Fig. 1 – video 1).

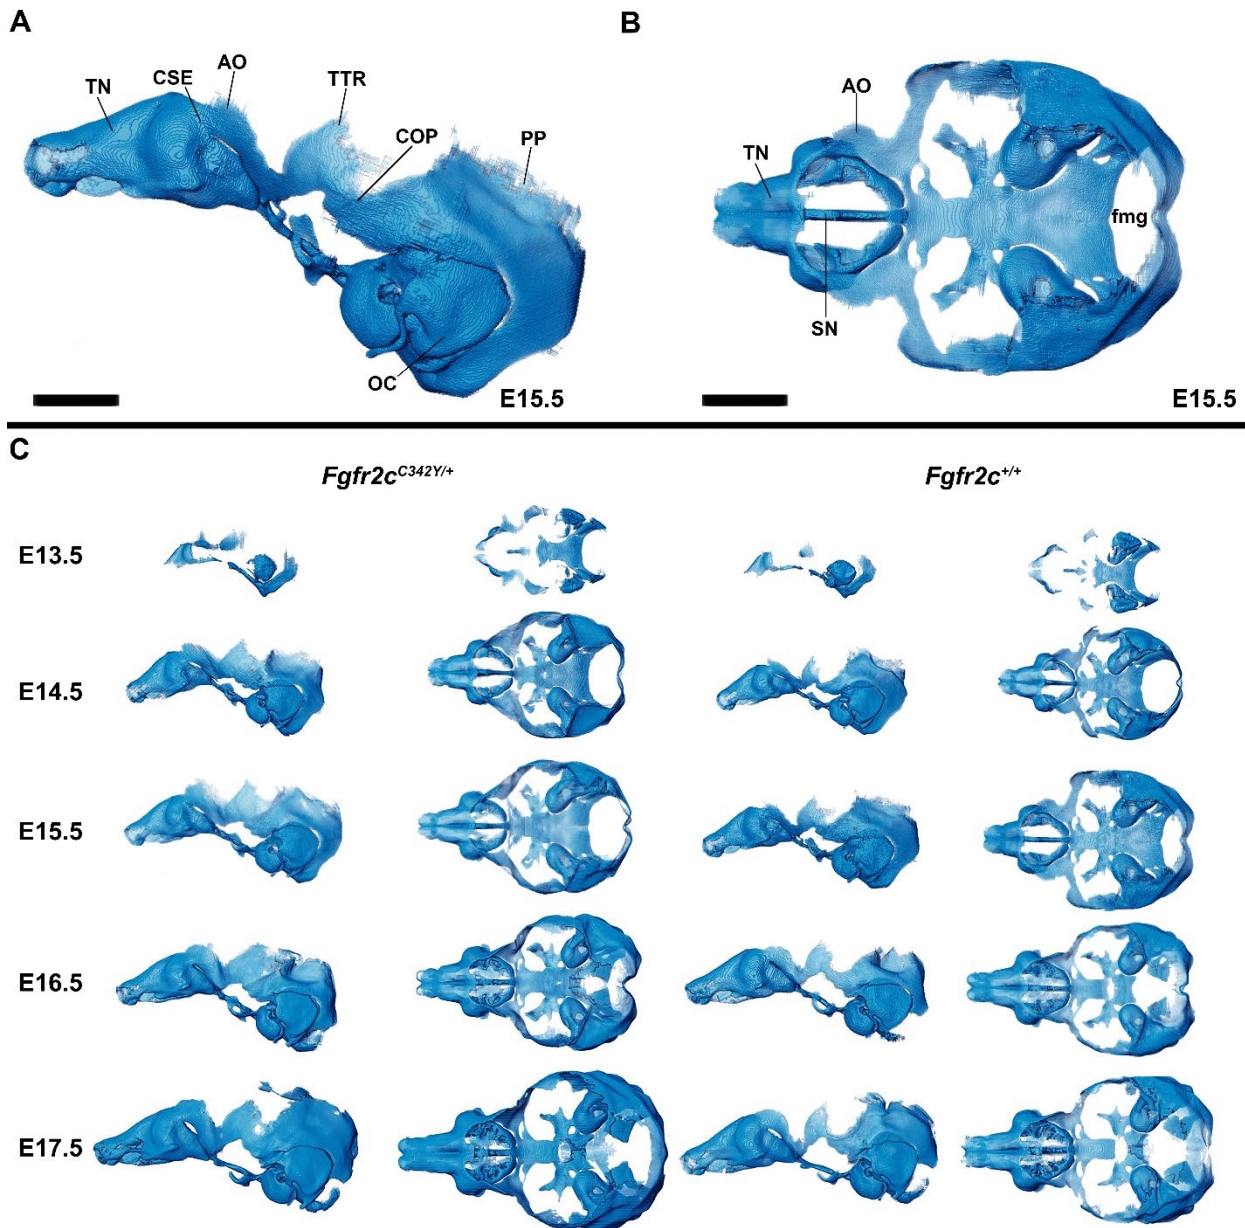

189

190 **Figure 1. Anatomy of the mouse embryonic chondrocranium.** (A, B) At E15.5, the *Fgfr2c*<sup>+/+</sup>  
191 mouse chondrocranium (A, lateral and B, superior views) is complete, consisting of the olfactory  
192 region (B), braincase floor (B), and lateral walls of the preoccipital and occipital regions (A).



193 Specific areas of interest include the ala orbitalis (AO), sphenethmoid commissure (CSE), otic  
194 capsule (OC), parietal plate (PP), septum nasi (SN), tectum nasi (TN),  
195 orbitoparietal commissure (COP), and tectum transversum (TTR) cartilages and the foramen  
196 magnum (fmg). (C) 3D reconstructions of *Fgfr2c*<sup>+/+</sup> and *Fgfr2c*<sup>C342Y/+</sup> chondrocrania from E13.5  
197 to E17.5 in lateral and superior views with nasal capsule to the left. Scale bars = 1mm. See  
198 supplemental figures for expanded discussion. A cartoon of the mouse chondrocranium with  
199 more extensive anatomical labeling of cartilages and discussion of their development can be  
200 found in (Kawasaki and Richtsmeier, 2017a, 2017b)

201

## 202 **The chondrocranium**

### 203 **Morphology of the mouse embryonic chondrocranium E13.5-E17.5**

204 The appearance of the parachordal cartilages marks the initiation of the chondrocranium in  
205 C57BL/6J mice at E12.5 (Kawasaki and Richtsmeier, 2017a, 2017b) with the subsequent  
206 appearance and continual growth of additional chondrocranial cartilages (Kawasaki and  
207 Richtsmeier, 2017a; Pitirri et al., 2020). By E13.5, the lateral wall of the preoccipital region of  
208 *Fgfr2c*<sup>C342Y/+</sup> mice consists of well-developed ala orbitalis (AO), sphenethmoid commissure  
209 (CSE), and tectum transversum (TTR), while *Fgfr2c*<sup>+/+</sup> mice do not adequately develop these  
210 structures until E14.5 (Fig. 1, Fig. 1 – supplemental figure 2). The tectum nasi (TN), AO, and  
211 TTR are more developed and thicker in *Fgfr2c*<sup>C342Y/+</sup> mice as compared to *Fgfr2c*<sup>+/+</sup> mice at  
212 E13.5, as shown by 3D thickness maps (Fig. 2A, 2D, Fig. 2. – supplemental figure 1) and  
213 cleared and stained specimens (Fig. 2B, 2C, Fig. 2. – supplemental figure 1). At E13.5,  
214 *Fgfr2c*<sup>C342Y/+</sup> and *Fgfr2c*<sup>+/+</sup> mice show a break in the cranial base between the septum nasi (SN)  
215 and the hypophysis (Fig. 1C, Fig. 1 – supplemental figure 1; Fig. 2; Fig. 2. – supplemental figure  
216 1). At E13.5, the AO and TTR extend further apically over the developing brain and are larger in  
217 *Fgfr2c*<sup>C342Y/+</sup> mice relative to *Fgfr2c*<sup>+/+</sup> mice, and the portion of the orbitoparietal commissure  
218 (COP) rostral to the TTR contains relatively more cartilage along its apical lip (Fig. 1, Fig. 1 –  
219 supplemental figure 1; Fig. 2; Fig. 2 – supplemental figure 1). This results in a broader and  
220 thicker rim of cartilage along the lateral wall, which in some *Fgfr2c*<sup>C342Y/+</sup> individuals provides  
221 uninterrupted coverage of the lateral aspect of the preoccipital region (Fig. 1 and Fig. 2). From  
222 E14.5 through E17.5, the AO and TTR appear thicker and extend more apically in *Fgfr2c*<sup>C342Y/+</sup>

223 relative to *Fgfr2c*<sup>+/+</sup> mice, with more apical projections of thin parietal plate (PP) cartilage over  
224 time, even as skull bone mineralizes (Fig. 2B, 2C; Fig. 2 – supplemental figures 2-5). Most  
225 elements of the chondrocranium have formed by E15.5 (Fig. 1, Fig. 1 – supplemental figure 3;  
226 Fig. 2, Figure 2 – supplemental figure 3). Endochondral ossification has not yet initiated at this  
227 age and dermatocranial elements are just beginning to form so the E15.5 skull is predominantly  
228 cartilaginous (Fig. 1 – video 1, Fig. 1 – video 2). Disintegration of portions of the  
229 chondrocranium is not evident at E15.5 but prior to E16.5, AO, TTR, and COP begin to dissolve  
230 in both genotypes, becoming thinner and taking on a lace-like appearance (Fig. 1C, Fig. 1 –  
231 supplemental figure 3, Fig. 1 – supplemental figure 4; Fig. 2, Fig. 2 – supplemental figure 3; Fig.  
232 2 – supplemental figure 4). Though cartilage is disappearing in both genotypes at E17.5,  
233 cartilages of the *Fgfr2c*<sup>C342Y/+</sup> chondrocrania remain more complete relative to *Fgfr2c*<sup>+/+</sup> mice at  
234 this age (Fig. 1C, Fig. 1 – supplemental figure 5, Fig 2; Fig. 2 – supplemental figure 5). After  
235 E17.5, additional parts of the chondrocranium either begin or continue to thin and disappear in  
236 both genotypes as the dermatocranium thickens and expands.

237

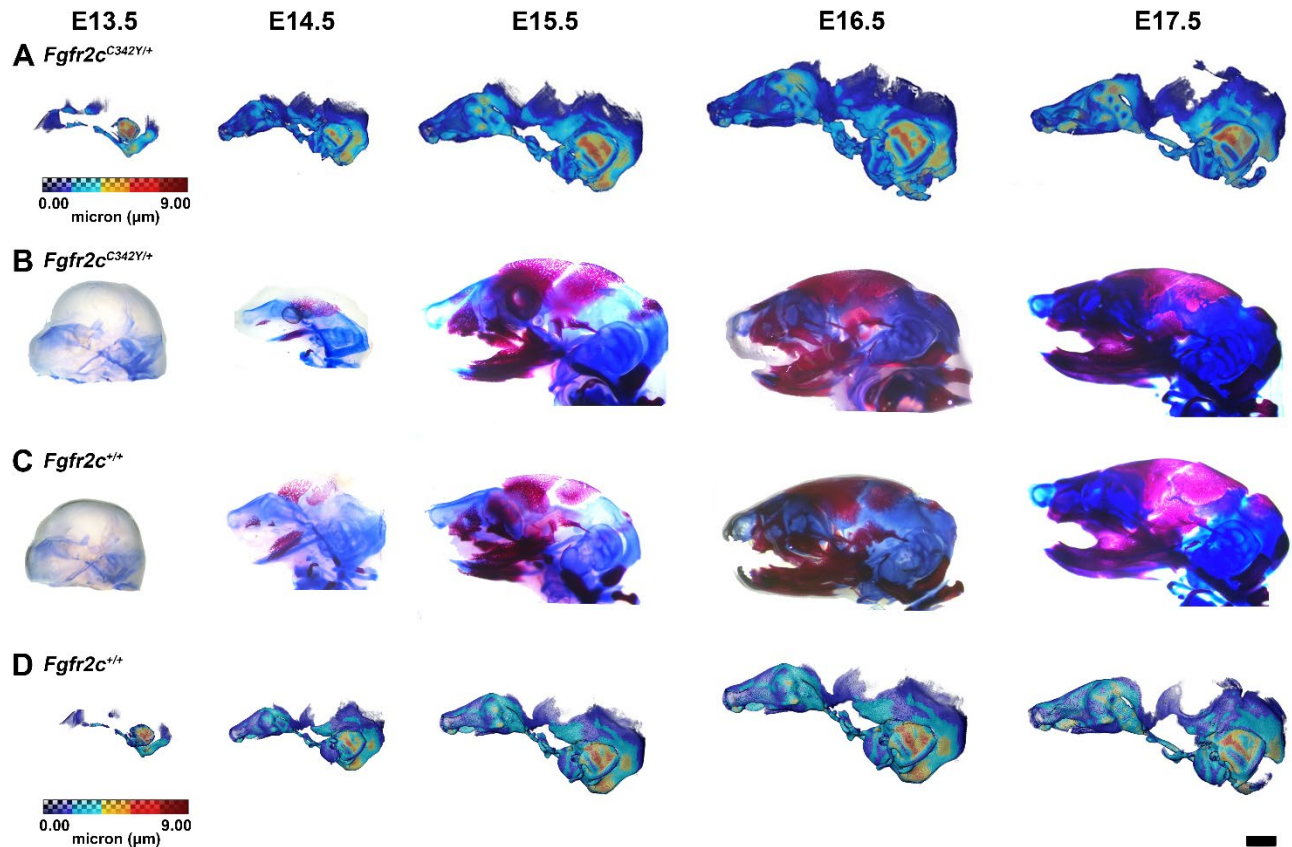

238

239 **Figure 2. Thickness maps of the chondrocranium of mice segmented from PTA-enhanced**  
240 **microCT images and similarly aged cleared and stained specimens, E13.5 - E17.5. (A, D)**  
241 **Thickness maps of *Fgfr2c*<sup>C342Y/+</sup> (A) and *Fgfr2c*<sup>+/+</sup> (D) mice segmented from PTA-enhanced**  
242 **microCT images. Colormap indicates cartilage thickness that ranged from just over 0  $\mu$ m (dark**  
243 **blue) to nearly 9  $\mu$ m (dark red). (B, C) *Fgfr2c*<sup>C342Y/+</sup> (B) and *Fgfr2c*<sup>+/+</sup> (C) specimens that were**  
244 **chemically cleared are stained with Alcian blue indicating proteoglycans in cartilage and alizarin**  
245 **red indicating calcium deposits. Scalebar = 1 mm.**

246

247 We used a suite of landmarks whose 3D coordinates (doi:10.26207/qgke-r185) could be  
248 reliably located across embryonic age groups (Table 1) to estimate differences in  
249 chondrocranial morphology. We analyzed three distinct configurations of 3D landmark  
250 coordinates representing cartilages of the nasal capsule, of the braincase floor, and of the  
251 lateral walls and roof of the vault using Euclidean Distance Matrix Analysis (EDMA) (Lele and  
252 Richtsmeier, 2001) (see Experimental Procedures section). Since the number of landmarks  
253 exceeds the sample size for these age groups, direct testing of the hypothesis of shape

254 **Table 1. Anatomical definitions of chondrocranial landmarks used in EDMA comparisons**  
 255 **and Morphological Integration analyses.** Landmark locations can be visualized on a 3D  
 256 reconstruction of the embryonic mouse chondrocranium: <https://getahead.la.psu.edu/landmarks/>

| Chondrocranium landmarks for specimens aged E14.5, E15.5, E16.5 and E17.5 |                                                                                                |                                          |                                        |                                                                                   |                                                                                                   |
|---------------------------------------------------------------------------|------------------------------------------------------------------------------------------------|------------------------------------------|----------------------------------------|-----------------------------------------------------------------------------------|---------------------------------------------------------------------------------------------------|
| Landmark description                                                      |                                                                                                | Anatomical region of interest            |                                        |                                                                                   |                                                                                                   |
| Landmark abbreviation                                                     | Landmark definition                                                                            | Olfactory capsule landmarks used in EDMA | Braincase floor landmarks used in EDMA | Lateral wall and roof of preoccipital and occipital region landmarks used in EDMA | Lateral wall and roof of preoccipital region landmarks used in Morphological Integration analysis |
| asep                                                                      | Most anterior point of the septum nasi                                                         | x                                        |                                        |                                                                                   |                                                                                                   |
| lao                                                                       | Most superior point on the ala orbitalis, left side                                            |                                          |                                        | x                                                                                 |                                                                                                   |
| laotr                                                                     | Most superior point of the intersection of the ala orbitalis and tectum transversum, left side |                                          |                                        | x                                                                                 | x                                                                                                 |
| lapnc                                                                     | Most anterior point of the paraseptal cartilage, left side                                     |                                          |                                        |                                                                                   |                                                                                                   |
| lcsp                                                                      | Intersection of the sphenocochlear commissure (CSC) and pars cochlearis (PCO), left side       |                                          | x                                      |                                                                                   |                                                                                                   |
| llpco                                                                     | Most lateral point on the pars cochlearis (PCO), left side                                     |                                          | x                                      |                                                                                   |                                                                                                   |
| llpmo                                                                     | Most lateral point on the left pila metopitica (PMO), left side                                |                                          | x                                      |                                                                                   |                                                                                                   |

|        |                                                                                                                                                                     |   |   |   |   |
|--------|---------------------------------------------------------------------------------------------------------------------------------------------------------------------|---|---|---|---|
| lncse  | Most superior anterior point where the nasal capsule (pars intermedia) intersects with the sphenethmoid commissure (CSE), left side                                 | x |   |   | x |
| lpncw  | Left posterior nasal cartilage width, taken on the point of the prominentia maxillaris/prominentia inferior near the bottom of the sulcus posterior lateralis (SPL) | x |   |   |   |
| lppnc  | Most posterior point of the paraseptal cartilage, left side                                                                                                         | x |   |   |   |
| ltpoa  | Intersection of the tectum posterior (TP) and occipital arch (OA) on the foramen magnum, left side                                                                  |   |   | x |   |
| litt   | Most superior point on TTR (tectum transversum), left side                                                                                                          |   |   | x | x |
| nct    | Most posterior midpoint at which the left and right nasal capsule connects with the trabecular cartilage                                                            | x | x |   |   |
| psep   | Most posterior point of the septum nasi                                                                                                                             | x |   |   | x |
| rao    | Most superior point on the ala orbitalis, right side                                                                                                                |   |   | x |   |
| raottr | Most superior point of the intersection of the ala orbitalis and tectum transversum, right side                                                                     |   |   | x | x |
| rapnc  | Most anterior point of the paraseptal cartilage, right side                                                                                                         | x |   |   |   |

|       |                                                                                                                                                                      |   |   |   |   |
|-------|----------------------------------------------------------------------------------------------------------------------------------------------------------------------|---|---|---|---|
| rcsp  | Intersection of the sphenocochlear commissure (CSC) and pars cochlearis (PCO), right side                                                                            |   | x |   |   |
| rlpco | Most lateral point on the pars cochlearis (PCO), right side                                                                                                          |   | x |   |   |
| rlpmo | Most lateral point on the left pila metopitica (PMO), right side                                                                                                     |   | x |   |   |
| rncse | Most superior anterior point where the nasal capsule (pars intermedia) intersects with the sphenethmoid commissure (CSE), right side                                 | x |   |   | x |
| rpnw  | Right posterior nasal cartilage width, taken on the point of the prominentia maxillaris/prominentia inferior near the bottom of the sulcus posterior lateralis (SPL) | x |   |   |   |
| rppnc | Most posterior point of the paranasal cartilage, right side                                                                                                          | x |   |   |   |
| rtpoa | Intersection of the tectum posterior (TP) and occipital arch (OA) on the foramen magnum, right side                                                                  |   |   | x |   |
| rtt   | Most superior point on TTR (tectum transversum), right side                                                                                                          |   |   | x | x |

257

258 differences between chondrocrania of the two genotypes is not reported. Instead, confidence  
 259 intervals ( $\alpha = 0.10$ ) for form difference estimators based on EDMA were implemented using the  
 260 model independent bootstrap method (Lele and Richtsmeier, 1995). Confidence intervals were

261 used to ascertain statistically significant estimates of localized morphological differences  
262 between genotypes with a statement regarding their accuracy.

263 At E13.5, delayed development of some structures made acquisition of all landmarks  
264 impossible and sample sizes were small (N=3), so confidence intervals are not reported. Still,  
265 77% of all linear distances were larger in *Fgfr2c*<sup>C342Y/+</sup> chondrocrania at E13.5, and of those,  
266 40% showed increased size in *Fgfr2c*<sup>C342Y/+</sup> mice ranging from 5% to 46%. By E14.5, over half of  
267 the linear distances among chondrocranial landmarks are 5-30% larger in *Fgfr2c*<sup>C342Y/+</sup> mice.  
268 Local differences vary in magnitude at E14.5, and not all differences are statistically significant,  
269 but data indicate a sustained, global increase in size of *Fgfr2c*<sup>C342Y/+</sup> chondrocrania relative to  
270 *Fgfr2c*<sup>+/+</sup> littermates. By E15.5, measures that summarize the entire chondrocranium are  
271 relatively larger in *Fgfr2c*<sup>C342Y/+</sup> mice as shown by confidence interval (Fig. 3A, C, Fig. 3 – video  
272 1) and remain that way through E16.5. This difference becomes more localized with  
273 development so that by E17.5, significant differences are concentrated in the lateral walls of the  
274 preoccipital region extending to the posterior aspect of olfactory capsule (Fig. 3D, F, Fig. 3 –  
275 video 2).

276 For all ages considered, linear distances that measure the width and rostrocaudal length  
277 of the walls of the pre- and post-occipital regions are larger in *Fgfr2c*<sup>C342Y/+</sup> mice relative to  
278 *Fgfr2c*<sup>+/+</sup> littermates. The apical height of the TTR is relatively increased at all ages in  
279 *Fgfr2c*<sup>C342Y/+</sup> mice (Fig 3A, 3D) and excess cartilage is deposited along the apical edge of the  
280 COP (Fig. 1C, Fig. 1 – supplemental figure 4; Fig. 2; Fig. 2 – supplemental figures 1-5). Select  
281 cartilages of the braincase floor are statistically larger in *Fgfr2c*<sup>C342Y/+</sup> mice at E14.5 (ranging  
282 from 4-7% larger) but the magnitude of differences of braincase floor dimensions between  
283 genotypes diminishes with age, with fewer statistically significant differences between  
284 genotypes at E15.5, E16.5, and E17.5. The olfactory capsule is significantly larger in nearly all  
285 dimensions in *Fgfr2c*<sup>C342Y/+</sup> mice at E14.5, with some dimensions being as much as 25% larger  
286 relative to *Fgfr2c*<sup>+/+</sup> littermates. The exception is the area described by the landmarks that

287 delineate the superior surface of the posterior nasal capsule (landmarks: rncse, lncse, psep; see  
288 doi:10.26207/qgke-r185 for landmark data), which is consistently smaller in *Fgfr2c*<sup>C342Y/+</sup> mice,  
289 though not statistically significantly smaller until E16.5. Excepting these dimensions, the  
290 olfactory capsule of *Fgfr2c*<sup>C342Y/+</sup> mice remains relatively large through E17.5, though the  
291 magnitude of significant differences reduces with age, ranging from 5-15% (Fig. 3D, 3F; Fig. 3 –  
292 video 2).



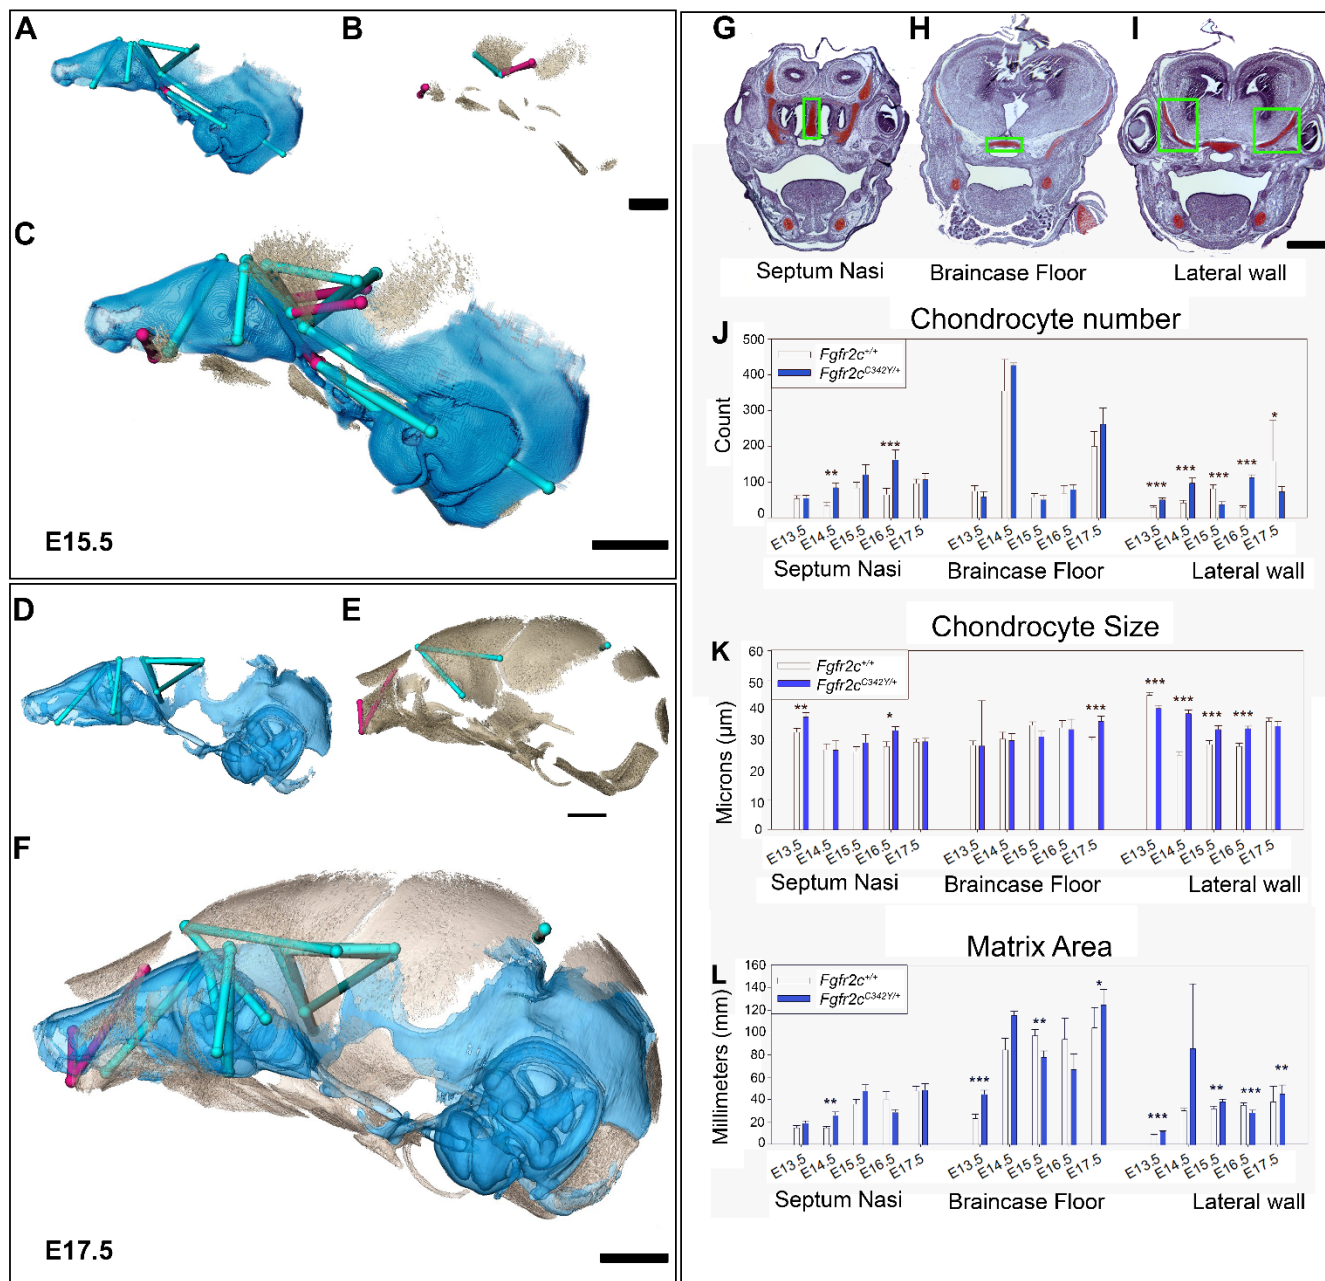

293 **Figure 3. Euclidean Distance Matrix Analysis of the chondrocranium and bony skull and**  
 294 **histomorphology of the chondrocranium.** Linear distances of the chondrocranium (A, D),  
 295 bony skull (B, E) and the two superimposed (C, F) that are statistically significantly different  
 296 between genotypes by confidence interval testing ( $\alpha = 0.10$ ). Blue lines indicate linear distances  
 297 that are significantly larger in *Fgfr2c*<sup>C342Y/+</sup> mice; fuchsia lines are significantly reduced in  
 298 *Fgfr2c*<sup>C342Y/+</sup> mice. (A-F) Significant differences between chondrocranium and bony skulls of  
 299 *Fgfr2c*<sup>+ / C342Y</sup> and *Fgfr2c*<sup>+ / +</sup> mice. A limited landmark set common to the chondrocranium and bony skull  
 300 of E15.5 (A-C) and E17.5 (D-F) embryos was used for analyses and indicated that the  
 301 lateral wall and olfactory regions are most different between *Fgfr2c*<sup>C342Y/+</sup> and *Fgfr2c*<sup>+ / +</sup> mice at  
 302 these ages. (G-L) Histomorphology of the chondrocranium. Histological sections of the E15.5  
 303 chondrocranium highlighting the septum nasi (G), braincase floor (H), and lateral walls (I) in  
 304 green boxes. These areas were assessed at E13.5, E14.5, E15.5, E16.5, and E17.5 for

305 chondrocyte number (**J**), chondrocyte size (**K**), and area of cartilaginous matrix (**L**) in  
306 *Fgfr2c*<sup>C342Y/+</sup> and *Fgfr2c*<sup>+/+</sup> mice. In agreement with the larger chondrocrania of *Fgfr2c*<sup>C342Y/+</sup>  
307 mice, there are localized regions that reveal increases in chondrocyte number, size, and/or  
308 contribution of matrix at each timepoint. Note the trend of increasing numbers of chondrocytes  
309 over time as expected in a growing chondrocranium (M). For histological analysis \*p≤0.05,  
310 \*\*p≤0.01, \*\*\*p≤0.001. Scalebars = 1 mm. Video of 3D reconstructions of Figs. 3C and 3F are  
311 available as [Fig. 3 – Video 1](#) and [Fig. 3 – Video 2](#).  
312

### 313 Cellular characterization of embryonic cartilage of the chondrocranium

314 Observations of growth plate cartilages in long bones identify chondrocyte proliferation,  
315 hypertrophy, and matrix deposition as the cellular processes that contribute to cartilage growth  
316 (Breur et al., 1991; Cooper et al., 2013; Wilsman et al., 2008) while Kaucka and colleagues  
317 (Kaucka et al., 2017) proposed oriented clonal cell dynamics as the basis for accurate shaping  
318 of nasal cartilages. To investigate the cellular basis of morphological differences in  
319 chondrocranial morphology we analyzed the number and size of chondrocytes and the amount  
320 of matrix per region of interest in the septum nasi, braincase floor, and the lateral walls of the  
321 chondrocranium in *Fgfr2c*<sup>C342Y/+</sup> mice relative to *Fgfr2c*<sup>+/+</sup> littermates at E13.5, E14.5, E15.5,  
322 E16.5, and E17.5 (Fig. 3G-L). These three areas represent chondrocranial elements that either  
323 remain as cartilage in the adult (septum nasi), ossify endochondrally (brain case floor), or  
324 disappear (lateral wall). We found significantly more chondrocytes in *Fgfr2c*<sup>C342Y/+</sup> septum nasi  
325 at E14.5 (p=0.006) and E16.5 (p≤0.001) relative to *Fgfr2c*<sup>+/+</sup> littermates (Fig. 3J). Chondrocytes  
326 in the septum nasi were larger in *Fgfr2c*<sup>C342Y/+</sup> mice at E13.5 (p=0.004) and E16.5 (p=0.016)  
327 (Fig. 3K). The amount of matrix within the septum nasi was increased at E14.5 (p=0.003) in  
328 *Fgfr2c*<sup>C342Y/+</sup> mice relative to *Fgfr2c*<sup>+/+</sup> littermates (Fig. 3L).

329 Histological analysis of braincase floor cartilage that mineralizes endochondrally  
330 indicates no changes in chondrocyte number between genotypes at any of the ages  
331 investigated, in agreement with our observation of similarity of 3D morphology of the braincase  
332 floor cartilages. Chondrocyte size was increased in *Fgfr2c*<sup>C342Y/+</sup> mice relative to *Fgfr2c*<sup>+/+</sup>  
333 littermates only at E17.5 (p=0.001) (Fig. 3K). The amount of matrix was relatively increased in

334 the braincase floor cartilage of *Fgfr2c*<sup>C342Y/+</sup> mice at E13.5 ( $p \leq 0.001$ ) and E17.5 ( $p = 0.042$ ) but  
335 between these ages, at E15.5, the amount of matrix is relatively decreased in *Fgfr2c*<sup>C342Y/+</sup> mice  
336 ( $p = 0.013$ ) (Fig. 3L).

337 Differences in the cartilages of the lateral walls contribute strongly to morphological  
338 differences between genotypes, reflecting the relatively early formation of these cartilages and  
339 their subsequent disintegration starting at E16.5 associated with dermal bone mineralization  
340 (especially the frontal and parietal bones) (Kawasaki and Richtsmeier, 2017a). Relatively more  
341 chondrocytes were identified in lateral wall cartilages of *Fgfr2c*<sup>C342Y/+</sup> mice at E13.5 ( $p \leq 0.001$ ),  
342 E14.5 ( $p \leq 0.001$ ), and E16.5 ( $p \leq 0.001$ ), but at E15.5 and E17.5 there are more cells in the lateral  
343 walls of *Fgfr2c*<sup>+/+</sup> individuals ( $p \leq 0.001$  and  $p = 0.036$ , respectively) (Fig. 3J). Cell size is relatively  
344 greater in *Fgfr2c*<sup>+/+</sup> lateral wall cartilages during early (E13.5,  $p \leq 0.001$ ) prenatal development.  
345 Later, chondrocytes are relatively larger in *Fgfr2c*<sup>C342Y/+</sup> mice (E14.5  $p \leq 0.001$ , E15.5  $p = 0.001$ ,  
346 E16.5  $p \leq 0.001$ ), consistent with the identification of a larger chondrocranium in *Fgfr2c*<sup>C342Y/+</sup>  
347 mice for these ages (Fig. 3K). Area of cartilage matrix is greater in *Fgfr2c*<sup>C342Y/+</sup> mice at E13.5  
348 ( $p \leq 0.001$ ), E15.5 ( $p = 0.010$ ) and E17.5 ( $p = 0.009$ ). The relative increase in chondrocytes in the  
349 lateral wall cartilages of *Fgfr2c*<sup>+/+</sup> individuals at E15.5 is followed by an increase in cartilage  
350 matrix area in *Fgfr2c*<sup>+/+</sup> individuals at E16.5 ( $p \leq 0.001$ ) (Fig. 3L). Consequently, the significantly  
351 larger chondrocytes in *Fgfr2c*<sup>C342Y/+</sup> mice at E16.5 account for the observed relative increase in  
352 size of the lateral wall cartilages.

353 In sum, we generally observed a trend of more chondrocytes, larger chondrocytes,  
354 and/or more matrix in the *Fgfr2c*<sup>C342Y/+</sup> mice as compared to their *Fgfr2c*<sup>+/+</sup> littermates at all  
355 timepoints prior to the disintegration of the chondrocranium beginning at E16.5. Localized  
356 differences are apparent across the cartilages we chose for study demonstrating that this is a  
357 complex system with mutually interactive characters (chondrocyte number, chondrocyte size,  
358 and matrix area) that react to the *Fgfr2c* C342Y mutation in a location specific (septum nasi,  
359 braincase floor, lateral wall) and temporally sensitive manner.

## 360 ***The bony skull***

### 361 Coronal suture fusion and bone volume

362 Initial mineralization of cranial dermal bone is apparent by alizarin red staining at E14.5  
 363 (Fig. 2B, C; Fig. 2. – supplemental figure 2), but individual cranial bones are not easily detected  
 364 by microCT until E15.5 (Fig. 3B). Using microCT, none of the mice show complete fusion of the  
 365 coronal suture prior to birth (postnatal day 0; P0) but half (9/18) of the *Fgfr2c*<sup>C342Y/+</sup> mice show  
 366 bridging of one or both coronal sutures at E17.5, and by birth (postnatal day 0 (P0)), all  
 367 *Fgfr2c*<sup>C342Y/+</sup> mice (11/11) show partial or complete closure of one or both coronal sutures (Fig.  
 368 4A-4C; doi:10.26207/qgke-r185). Coupled with evidence by alizarin red staining of partially  
 369 fused sutures at E17.5 by other investigators (Peskest et al., 2017) this confirms that coronal  
 370 suture closure occurs between E17.5 and P0 in most *Fgfr2c*<sup>C342Y/+</sup> mice (Martínez-Abadías et  
 371 al., 2013).

372 Bone size and volume are highly variable in both genotypes during prenatal  
 373 development, but bone volume estimates reveal that some dermal bones (i.e., nasal, palatine,  
 374 vomer) and an endochondral bone (basioccipital) are significantly larger in *Fgfr2c*<sup>C342Y/+</sup> mice at  
 375 P0 relative to *Fgfr2c*<sup>+/+</sup> littermates. At E17.5, only the vomer is significantly larger in *Fgfr2c*<sup>C342Y/+</sup>  
 376 mice relative to *Fgfr2c*<sup>+/+</sup> littermates (Table 2).

377 **Table 2. Bone volume summary statistics at E17.5 and P0 for *Fgfr2c*<sup>C342Y/+</sup> mice and their**  
 378 ***Fgfr2c*<sup>+/+</sup> littermates.** At E17.5, bone volume of the vomer (P=0.017) was significantly different  
 379 between genotypes. At P0, bone volumes of the basioccipital (P=0.009), right nasal (P=0.043),  
 380 left palatine (P=0.029), and right palatine (0.019) were significantly different between genotypes.  
 381 Sample size (N) varied by availability of individual bone for analysis. Interfrontal and ethmoid  
 382 bones develop late and were not present in many specimens.

| Bone               | E17.5 <i>Fgfr2c</i> <sup>C342Y/+</sup> |      |      | E17.5 <i>Fgfr2c</i> <sup>+/+</sup> |      |      | P0 <i>Fgfr2c</i> <sup>C342Y/+</sup> |      |      | P0 <i>Fgfr2c</i> <sup>+/+</sup> |      |      |
|--------------------|----------------------------------------|------|------|------------------------------------|------|------|-------------------------------------|------|------|---------------------------------|------|------|
|                    | N                                      | Mean | S.D. | N                                  | Mean | S.D. | N                                   | Mean | S.D. | N                               | Mean | S.D. |
| Interparietal      | 14                                     | 0.16 | 0.06 | 13                                 | 0.18 | 0.06 | 10                                  | 0.40 | 0.07 | 10                              | 0.40 | 0.10 |
| Squamous Occipital | 13                                     | 0.16 | 0.11 | 13                                 | 0.13 | 0.09 | 10                                  | 0.63 | 0.10 | 10                              | 0.58 | 0.11 |

|                         |    |      |      |    |      |      |    |      |      |    |      |      |
|-------------------------|----|------|------|----|------|------|----|------|------|----|------|------|
| Left Lateral Occipital  | 14 | 0.43 | 0.06 | 13 | 0.42 | 0.05 | 10 | 0.65 | 0.06 | 10 | 0.59 | 0.07 |
| Right Lateral Occipital | 14 | 0.42 | 0.06 | 13 | 0.41 | 0.05 | 10 | 0.64 | 0.07 | 10 | 0.58 | 0.07 |
| Basioccipital           | 14 | 0.58 | 0.08 | 13 | 0.53 | 0.06 | 10 | 0.88 | 0.09 | 10 | 0.74 | 0.10 |
| Left Parietal           | 14 | 0.34 | 0.08 | 13 | 0.36 | 0.09 | 10 | 0.71 | 0.09 | 10 | 0.68 | 0.14 |
| Right Parietal          | 13 | 0.35 | 0.09 | 13 | 0.37 | 0.08 | 10 | 0.73 | 0.09 | 10 | 0.69 | 0.15 |
| Left Squamous Temporal  | 14 | 0.13 | 0.03 | 13 | 0.13 | 0.03 | 10 | 0.30 | 0.03 | 10 | 0.30 | 0.06 |
| Right Squamous Temporal | 14 | 0.12 | 0.03 | 13 | 0.12 | 0.03 | 10 | 0.32 | 0.04 | 10 | 0.30 | 0.06 |
| Left Frontal            | 14 | 0.74 | 0.16 | 13 | 0.66 | 0.12 | 10 | 1.30 | 0.13 | 10 | 1.14 | 0.19 |
| Right Frontal           | 14 | 0.74 | 0.16 | 13 | 0.65 | 0.12 | 10 | 1.28 | 0.13 | 10 | 1.13 | 0.18 |
| Interfrontal            | 12 | 0.01 | 0.01 | 9  | 0.00 | 0.00 | 10 | 0.03 | 0.01 | 0  | 0    | 0    |
| Left Maxilla            | 14 | 0.48 | 0.10 | 13 | 0.48 | 0.08 | 10 | 0.93 | 0.14 | 10 | 0.82 | 0.15 |
| Right Maxilla           | 14 | 0.48 | 0.10 | 13 | 0.47 | 0.08 | 10 | 0.92 | 0.14 | 10 | 0.82 | 0.15 |
| Left Jugal              | 14 | 0.03 | 0.01 | 13 | 0.02 | 0.01 | 10 | 0.05 | 0.01 | 10 | 0.05 | 0.01 |
| Right Jugal             | 14 | 0.03 | 0.01 | 13 | 0.02 | 0.01 | 10 | 0.06 | 0.01 | 10 | 0.05 | 0.01 |
| Left Nasal              | 14 | 0.07 | 0.04 | 13 | 0.08 | 0.03 | 10 | 0.21 | 0.04 | 10 | 0.18 | 0.04 |
| Right Nasal             | 14 | 0.08 | 0.04 | 13 | 0.08 | 0.03 | 10 | 0.23 | 0.04 | 10 | 0.19 | 0.04 |
| Left Premaxilla         | 14 | 0.26 | 0.08 | 13 | 0.27 | 0.07 | 10 | 0.67 | 0.12 | 10 | 0.65 | 0.12 |
| Right Premaxilla        | 14 | 0.26 | 0.08 | 13 | 0.27 | 0.07 | 10 | 0.69 | 0.12 | 10 | 0.64 | 0.11 |
| Vomer                   | 14 | 0.09 | 0.02 | 13 | 0.07 | 0.01 | 10 | 0.16 | 0.04 | 10 | 0.13 | 0.03 |
| Left Palatine           | 14 | 0.23 | 0.05 | 13 | 0.20 | 0.03 | 10 | 0.42 | 0.07 | 10 | 0.36 | 0.06 |
| Right Palatine          | 14 | 0.23 | 0.05 | 13 | 0.20 | 0.04 | 10 | 0.42 | 0.06 | 10 | 0.36 | 0.05 |
| Presphenoid             | 14 | 0.02 | 0.02 | 13 | 0.03 | 0.02 | 10 | 0.24 | 0.05 | 10 | 0.20 | 0.03 |
| Left Sphenoid Ala       | 14 | 0.16 | 0.04 | 13 | 0.15 | 0.04 | 10 | 0.38 | 0.06 | 10 | 0.35 | 0.07 |
| Right Sphenoid Ala      | 14 | 0.15 | 0.04 | 13 | 0.14 | 0.03 | 10 | 0.38 | 0.06 | 10 | 0.34 | 0.06 |
| Sphenoid Body           | 14 | 0.27 | 0.06 | 13 | 0.27 | 0.05 | 10 | 0.57 | 0.06 | 10 | 0.51 | 0.08 |

|                        |    |      |      |    |      |      |    |      |      |    |      |      |
|------------------------|----|------|------|----|------|------|----|------|------|----|------|------|
| Left Petrous Temporal  | 14 | 0.03 | 0.01 | 13 | 0.03 | 0.01 | 10 | 0.25 | 0.10 | 10 | 0.31 | 0.11 |
| Right Petrous Temporal | 14 | 0.03 | 0.01 | 13 | 0.03 | 0.01 | 10 | 0.25 | 0.10 | 10 | 0.30 | 0.11 |
| Left Mandible          | 14 | 1.20 | 0.28 | 13 | 1.24 | 0.23 | 10 | 2.34 | 0.34 | 10 | 2.17 | 0.33 |
| Right Mandible         | 14 | 1.22 | 0.29 | 13 | 1.27 | 0.22 | 10 | 2.34 | 0.34 | 10 | 2.18 | 0.33 |
| Ethmoid                | 0  | 0    | 0    | 0  | 0    | 0    | 8  | 0.02 | 0.02 | 10 | 0.03 | 0.02 |

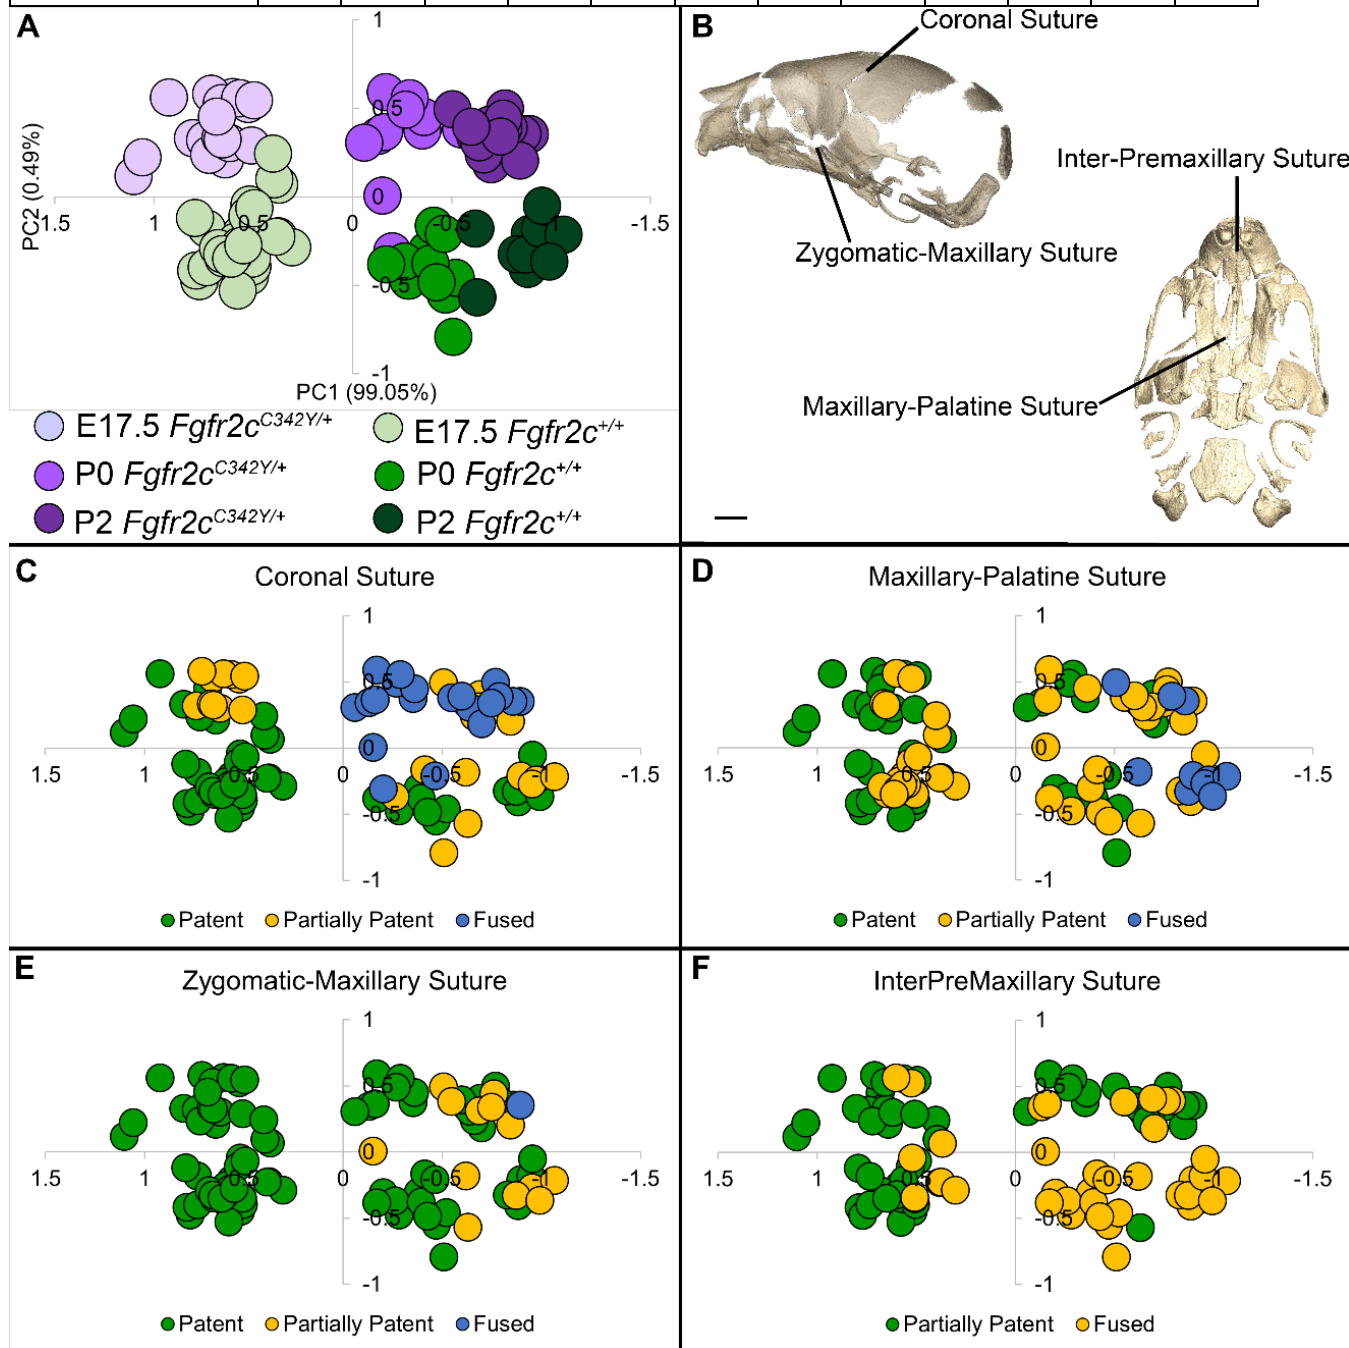

384 **Figure 4. Relationship of suture patency patterns and craniofacial shape as estimated by**  
 385 **principal components analysis (PCA).** (A) PCA of skull linear distance data estimated from  
 386 3D landmark locations collected from microCT images of mice at E17.5, P0, and P2 shows  
 387 distribution of all individuals along principal component 1 (PC1) and PC2. (B) Suture locations  
 388 shown on left lateral and inferior views of a microCT 3D reconstruction of a *Fgfr2c*<sup>+/+</sup> P0 skull.  
 389 (C-F) Distribution of individuals along PC1 and PC2 as shown in A coded for patency of the  
 390 coronal suture (C), the maxillary-palatine suture (D), the zygomatic-maxillary suture (E), and the  
 391 inter-premaxillary suture (F). Scalebar = 1 mm.

392

393 Morphometric comparison of pre- and post-natal *Fgfr2c*<sup>C342Y/+</sup> Crouzon mouse bony skull

394 Skulls of adult *Fgfr2c*<sup>C342Y/+</sup> mice show closure of the coronal sutures and small size  
 395 (Eswarakumar et al., 2004), with a domed cranial vault and skull lengths reduced by as much as  
 396 20% (Perlyn et al., 2006). We used a suite of landmarks whose 3D coordinates  
 397 (doi:10.26207/qgke-r185) could be reliably located across embryonic age groups (Table 3) to  
 398 explore differences in chondrocranial morphology from E17.5-P2. Principal components  
 399 analysis (PCA) of all linear distances among unique pairs of landmarks reveals that overall skull  
 400 shape separates mice into groups consistent with developmental age and genotype (Fig. 4A).  
 401 Patency scoring of four cranial sutures was used to explore the relationship of suture closure  
 402 patterns and morphological differences across developmental time (Fig. 4B-F;  
 403 doi:10.26207/qgke-r185).

**Table 3. Anatomical definitions of bony skull (dermal bone and endochondral bone) landmarks used in EDMA and Morphological Integration analyses.** Landmark locations can be visualized on 3D reconstructions of the embryonic mouse skull at <https://getahead.la.psu.edu/landmarks/>

| Bony Skull landmarks for ages E15.5 to P2 |                     |                                                           |                                                         |                                                             |                                                                    |                                                           |
|-------------------------------------------|---------------------|-----------------------------------------------------------|---------------------------------------------------------|-------------------------------------------------------------|--------------------------------------------------------------------|-----------------------------------------------------------|
| Landmark description                      |                     | Anatomical region of interest                             |                                                         |                                                             |                                                                    |                                                           |
| Landmark abbreviation                     | Landmark definition | Olfactory capsule landmark set used in EDMA of E15.5 – P2 | Braincase floor landmark set used in EDMA of E15.5 – P2 | Lateral wall and roof of pre-occipital and occipital region | Lateral wall and roof of pre-occipital region landmark set used in | Bony skull landmark set used in EDMA of E17.5, P0, and P2 |

|        |                                                                                              |  |   | landmark set used in EDMA of E15.5 – P2 | Morphological Integration analysis |   |
|--------|----------------------------------------------------------------------------------------------|--|---|-----------------------------------------|------------------------------------|---|
| amsph  | Most anterior-medial point on the body of the sphenoid                                       |  |   |                                         |                                    | x |
| bas    | Mid-point on the anterior margin of the foramen magnum, taken on basioccipital               |  | x |                                         |                                    | x |
| ethma  | Anterior most point on the body of the vomer, taken on the ventral surface                   |  |   |                                         |                                    | x |
| intpar | Most anterior point on the ectocranial surface of the interparietal on the midsagittal plane |  |   |                                         |                                    | x |
| laif   | Most anteroinferior point on the frontal bone, left side                                     |  |   | x                                       | x                                  |   |
| lalf   | Most anteromedial point on the frontal bone, left side                                       |  |   |                                         | x                                  |   |
| lalp   | Most anterolateral point on the palatine plate, left side                                    |  |   |                                         |                                    |   |



|         |                                                                                                                 |   |   |   |   |   |
|---------|-----------------------------------------------------------------------------------------------------------------|---|---|---|---|---|
| lasph   | Posteromedial point of the inferior portion of the left alisphenoid                                             |   |   |   |   | X |
| lflac   | Intersection of frontal process of maxilla with frontal and lacrimal bones, left side                           |   |   |   |   | X |
| lfppm   | Most superoposterior point of the premaxilla accounting for the lateral part of the nasal aperture, left side   | X |   |   |   | X |
| lio hd  | Most distal point of the infraorbital hiatus, left side                                                         | X |   |   |   | X |
| lnasapl | Most superoanterior point of the premaxilla accounting for the lateral part of the nasal aperture, left side    | X |   |   |   | X |
| loci    | The superior posterior point on the ectocranial surface of occipital lateralis on the foramen magnum, left side |   | X | X |   | X |
| lpfl    | Most lateral intersection of                                                                                    |   |   | X | X |   |

|       |                                                                                     |  |   |   |   |   |
|-------|-------------------------------------------------------------------------------------|--|---|---|---|---|
|       | the frontal and parietal bones, taken on the parietal, left side                    |  |   |   |   |   |
| lplpp | Most posterolateral point on the palatine plate, left side                          |  | x |   |   |   |
| lpsq  | Most posterior point on the posterior extension of the forming squamosal, left side |  | x |   |   | x |
| lpto  | Most posteromedial point on the parietal, left side                                 |  |   | x | x | x |
| lva   | Most posterior point on the left ala of the vomer                                   |  |   |   |   | x |
| raif  | Most anteroinferior point on the frontal bone, right side                           |  |   | x | x |   |
| raif  | Most anteromedial point on the frontal bone, right side                             |  |   | x |   |   |
| ralp  | Most anterolateral point on the palatine plate, right side                          |  |   |   |   |   |
| rasph | Posteromedial point of the inferior portion                                         |  |   |   |   | x |

|         |                                                                                                                                |   |   |   |  |   |
|---------|--------------------------------------------------------------------------------------------------------------------------------|---|---|---|--|---|
|         | of the right alisphenoid                                                                                                       |   |   |   |  |   |
| rflac   | Intersection of frontal process of maxilla with frontal and lacrimal bones, right side                                         |   |   |   |  | x |
| rfppm   | Most supero-posterior point of the premaxilla accounting for the lateral part of the nasal aperture, right side                | x |   |   |  | x |
| riohd   | Most distal point of the infraorbital hiatus, right side                                                                       | x |   |   |  | x |
| rmaxi   | The midline point on the premaxilla between the incisor and the nasal cavity just anterior of the incisive foramen, right side | x |   |   |  | x |
| rnasapl | Most supero-anterior point of the premaxilla accounting for the lateral part of the nasal aperture, right side                 | x |   |   |  | x |
| roci    | The supero posterior point on the ectocranial surface of occipital lateralis                                                   |   | x | x |  | x |

|       |                                                                                                 |  |   |   |   |   |
|-------|-------------------------------------------------------------------------------------------------|--|---|---|---|---|
|       | on the foramen magnum, right side                                                               |  |   |   |   |   |
| rpfl  | Most lateral intersection of the frontal and parietal bones, located on the frontal, right side |  |   | x | x |   |
| rp1pp | Most posterolateral point on the palatine plate, right side                                     |  | x |   |   |   |
| rpns  | Most anterolateral indentation at the posterior edge of the palatine plate, right side          |  |   |   |   | x |
| rpsq  | Most posterior point on the posterior extension of the forming squamosal, right side            |  | x |   |   | x |
| rpto  | Most posteromedial point on the parietal, right side                                            |  |   | x | x | x |
| rva   | Most posterior point on the right ala of the vomer                                              |  |   |   |   | x |

404

405 We used EDMA (Lele and Richtsmeier, 2001) and three distinct configurations of 3D  
 406 landmark coordinates representing bones of the facial skeleton, braincase floor, and lateral  
 407 walls and roof of the cranial vault whose 3D coordinates could be reliably located across ages

408 E15.5 through P2 (Table 3) to estimate differences in bony skull morphology (Fig. 3;  
409 doi:10.26207/qgke-r185). Confidence intervals ( $\alpha = 0.10$ ) were implemented using the model  
410 independent bootstrap method to reveal statistically significant estimates of localized  
411 morphological differences between genotypes at E15.5, E16.5, E17.5, P0 and P2 along with a  
412 statement on their variability (Lele and Richtsmeier, 1995).

413        Though studies of adults have shown *Fgfr2c*<sup>C342Y/+</sup> skulls to be significantly reduced in  
414 size, our analyses reveal that the bony skulls of *Fgfr2c*<sup>C342Y/+</sup> embryos are generally larger than  
415 those of *Fgfr2c*<sup>+/+</sup> littermates (Martínez-Abadías et al., 2013; Motch Perrine et al., 2017) (Table  
416 4; Fig. 3B, 3C, 3E, 3F; Fig. 5A, 5D). The lateral wall and roof of the cranial vault consist of  
417 dermal bones that show marked variability within and between genotypes at E15.5, likely due to  
418 differences in developmental timing among littermates (Flaherty and Richtsmeier, 2018).  
419 Dimensions of the *Fgfr2c*<sup>C342Y/+</sup> frontal and parietal bones are significantly larger relative to  
420 *Fgfr2c*<sup>+/+</sup> mice at E15.5, some by as much as 20% - but overall, the vault is nearly equal in  
421 length between genotypes. By E16.5 and continuing to E17.5, nearly all dimensions of the  
422 bones that make up the lateral walls and roof of the vault are larger in *Fgfr2c*<sup>C342Y/+</sup> mice,  
423 indicating a pattern of relatively increased growth of these dermal bones in mice carrying the  
424 *Fgfr2c* C342Y mutation (Fig. 3B, 3C, 3E-3F; Fig. 3 - video 1; Fig. 3 - video 2). There are no  
425 significant differences in braincase floor morphology between genotypes at E15.5 but at E16.5  
426 measures of bones of the braincase floor of *Fgfr2c*<sup>C342Y/+</sup> mice become larger across all  
427 dimensions relative to *Fgfr2c*<sup>+/+</sup> littermates. At E17.5, there are no significant differences  
428 between the two genotypes. Bones of the facial skeleton of both genotypes show marked  
429 variation at E15.5 resulting in few significant differences. Though not significantly different by  
430 confidence interval testing, dimensions of the developing maxilla are 5-15% larger in  
431 *Fgfr2c*<sup>C342Y/+</sup> mice at E16.5. By E17.5, many dimensions of anterior dermal cranial vault bones  
432 remain larger in mice carrying the mutation, but the overall length of the *Fgfr2c*<sup>C342Y/+</sup> vault is no  
433 longer larger anteroposteriorly relative to the vault of *Fgfr2c*<sup>+/+</sup> mice, suggesting that bones of

434 the posterior cranial vault are experiencing a different growth trajectory.

435 The increasing amount of mineralized bone with age enabled identification and use of a  
436 larger number of landmarks (K=24) for a comparative analysis of late embryonic (E17.5),  
437 newborn (P0) and early postnatal (P2) skull morphology between genotypes (Fig. 5; Table 3).

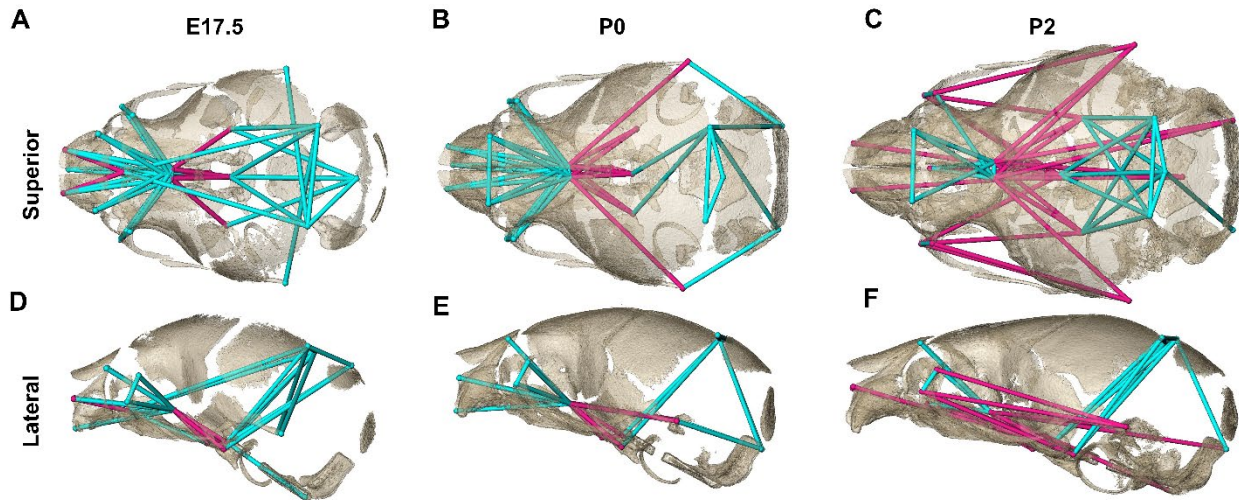

438  
439 **Figure 5. Euclidean Distance Matrix Analysis of the bony skull during late prenatal and**  
440 **early postnatal stages.** Increased mineralization allowed a larger set of landmarks to be used  
441 for statistical comparison of skull shape between genotypes at E17.5, P0, and P2 (as compared  
442 to Fig. 3). Superior (A-C) and lateral (D-F) views of linear distances of the bony skull that are  
443 statistically significantly different between genotypes by confidence interval testing ( $\alpha = 0.10$ ) at  
444 E17.5, P0, and P2. A *Fgfr2c*<sup>+/+</sup> dermatocranium is shown. Blue lines indicate linear distances  
445 that are significantly larger in *Fgfr2c*<sup>C342Y/+</sup> mice; fuchsia lines indicate linear distances that are  
446 significantly reduced in *Fgfr2c*<sup>C342Y/+</sup> mice. Quantitative patterns reveal a reversal in relative size  
447 postnatally, with the *Fgfr2c*<sup>C342Y/+</sup> skull becoming generally smaller than skulls of *Fgfr2c*<sup>+/+</sup>  
448 littermates.

449 At E17.5, as the lateral walls of the chondrocranium dissolve but prior to coronal suture fusion,  
450 regional form difference (Table 3 and Table 4) and confidence interval testing reveal a generally  
451 larger facial skeleton surrounding the olfactory capsule, a shortened and narrowed anterior  
452 braincase floor, and an expanded posterior cranial base and vault in *Fgfr2c*<sup>C342Y/+</sup> mice (Fig. 5A,  
453 5D). This general pattern continues at P0 though the magnitude of the differences is reduced  
454 (Fig. 5B, 5E). By P2, the height of the posterior cranial vault remains larger than normal (Fig.  
455 5F), as do measures of width of the lateral and occipital walls (Fig. 5C), but all measures  
456 oriented along the rostrocaudal axis are relatively reduced in *Fgfr2c*<sup>C342Y/+</sup> mice (Fig. 5C, 5F).  
457 Select dimensions of the *Fgfr2c*<sup>C342Y/+</sup> facial skeleton remain wide relative to *Fgfr2c*<sup>+/+</sup> littermates

458 at P2 but are relatively reduced rostro-caudally (Fig. 5C, 5F). Only bones of the most posterior  
459 aspect of the braincase floor remain relatively large in *Fgfr2c*<sup>C342Y/+</sup> mice at P2 (Fig 5C). That the  
460 majority of *Fgfr2c*<sup>C342Y/+</sup> skull dimensions are small relative to *Fgfr2c*<sup>+/+</sup> littermates at P2  
461 suggests that these differences are the result of altered early postnatal growth patterns in  
462 *Fgfr2c*<sup>C342Y/+</sup> mice.

463 **Table 4. Form difference of bony skulls.** Results (*P* values) of nonparametric null hypothesis  
464 tests for form differences (EDMA) of bony skull regions between *Fgfr2c*<sup>C342Y/+</sup> mice and their  
465 *Fgfr2c*<sup>+/+</sup> littermates using expanded set of landmarks.

| Age   | Olfactory capsule | Braincase floor | Lateral wall and roof of preoccipital and occipital region |
|-------|-------------------|-----------------|------------------------------------------------------------|
| E17.5 | 0.003             | 0.270           | 0.252                                                      |
| P0    | 0.003             | 0.004           | 0.038                                                      |
| P2    | 0.001             | 0.397           | 0.027                                                      |

466

#### 467 ***Morphological Integration of chondrocranium and dermatocranium***

468 Morphological integration (MI) refers to patterns of correlation and/or covariation among  
469 organismal traits with the degree of integration measured by the intensity of statistical  
470 association in the phenotype. Patterns of covariation emerge because organisms are  
471 constructed of units, or modules, that are coherent within themselves yet part of a larger unit.  
472 Modules result from structural or developmental associations within an organism (Chernoff and  
473 Magwene, 1999; Motch Perrine et al., 2017; Olson and Miller, 1958), but can also be outcomes  
474 of sample-specific developmental architecture and variation (Hallgrímsson et al., 2009)  
475 indicative of shared regulatory processes (Carroll, 2001; Weiss, 2005). We use a comparative  
476 study of MI of the chondrocranium and dermatocranium in *Fgfr2c*<sup>C342Y/+</sup> mice and *Fgfr2c*<sup>+/+</sup>  
477 littermates to determine whether coordinated patterns of association within and between these  
478 modules are altered by a *Fgfr2* genetic variant.

479 Linear distances within the chondrocranium and dermatocranium were estimated from  
480 3D coordinates of landmarks (see Table 1 and Table 3) and used to statistically compare MI  
481 patterns in *Fgfr2c*<sup>C342Y/+</sup> and *Fgfr2c*<sup>+/+</sup> mice within the chondrocranium, within the  
482 dermatocranium, and between chondrocranium and dermatocranium at E15.5 and E17.5 using  
483 previously published methods (Richtsmeier et al., 2006). MI patterns reported here are based  
484 on correlation matrices (doi:10.26207/qgke-r185) estimated in MIBoot, a Windows based  
485 software package (Cole III, 2002a). We consider any correlation coefficients with value of 0.60  
486 or greater as indicative of a relatively strong association, whether the correlation is positive or  
487 negative.

488 At E15.5, the mean of the absolute values of the correlation coefficients ( $\bar{r}$ ) among  
489 chondrocranial dimensions is large in *Fgfr2c*<sup>C342Y/+</sup> mice ( $\bar{r}=0.73$ ) relative to *Fgfr2c*<sup>+/+</sup> mice ( $\bar{r}$   
490  $=0.53$ ) but the pattern of correlation is similar in the two samples with few (14%) correlations  
491 significantly different between the two genotypes (Table 5). By E17.5 the mean of the absolute  
492 values of the correlation coefficients have decreased in both samples but remain relatively high  
493 in *Fgfr2c*<sup>C342Y/+</sup> mice ( $\bar{r}=0.61$ ) and the number of within-chondrocranial correlation coefficients  
494 that are significantly different between the samples is further reduced (9%). These results reveal  
495 a remarkable correspondence in overall patterns of within-chondrocranial associations in the  
496 two genotypes and a marked increase in strength of the correlations in *Fgfr2c*<sup>C342Y/+</sup> mice.

497 Approximately one day after the initial mineralization of cranial dermal bone at E15.5, the  
498 mean of the absolute values of correlation coefficients among dermatocranial dimensions are  
499 relatively strong in both genotypes (Table 5) and only twenty (9%) of the correlation coefficients  
500 among dermatocranial dimensions are significantly different between the two genotypes. By  
501 E17.5 the mean of the absolute value of correlation coefficients have decreased in both  
502 samples, though by a lesser amount in *Fgfr2c*<sup>C342Y/+</sup> mice, and a similarly small number of  
503 correlations are significantly different between genotypes.

504 **Table 5. Morphological integration of chondrocranium and dermatocranium.** Mean ( $\bar{x}$ ) and



505 standard deviation (s) of the absolute value of correlation coefficients for all chondrocranium  
 506 measures, all dermatocranium measures, and between all chondrocranium and  
 507 dermatocranium measures for E15.5 and E17.5 samples used in analysis.

|       |            | Dermatocranium |      | Chondrocranium |      | Dermatocranium and Chondrocranium |      |
|-------|------------|----------------|------|----------------|------|-----------------------------------|------|
| Age   | Genotype   | $\bar{x}$      | s    | $\bar{x}$      | s    | $\bar{x}$                         | s    |
| E15.5 | Affected   | 0.62           | 0.33 | 0.73           | 0.25 | 0.65                              | 0.30 |
|       | Unaffected | 0.68           | 0.31 | 0.53           | 0.29 | 0.42                              | 0.25 |
| E17.5 | Affected   | 0.59           | 0.29 | 0.61           | 0.28 | 0.46                              | 0.26 |
|       | Unaffected | 0.52           | 0.28 | 0.47           | 0.28 | 0.49                              | 0.27 |

508

509 Association of the chondrocranium and dermatocranium in *Fgfr2c*<sup>C342Y/+</sup> mice is strong ( $\bar{r}$   
 510 = 0.65) relative to their *Fgfr2c*<sup>+/+</sup> littermates ( $\bar{r}$  = 0.42) at E15.5 and statistical analysis of the  
 511 difference in MI reveals 183 (41.5%) of the correlations to be significantly different between  
 512 genotypes. Of these significant differences, 124 (28.1%) are due to a greater absolute  
 513 magnitude of correlation in *Fgfr2c*<sup>C342Y/+</sup> mice relative to *Fgfr2c*<sup>+/+</sup> littermates while 59 (13.4%) of  
 514 the differences are due to a significantly stronger association between chondrocranium and  
 515 dermatocranium in *Fgfr2c*<sup>+/+</sup> littermates. At E15.5, the significant differences in correlation  
 516 patterns are of two general types: 1) correlations between specific chondrocranium and  
 517 dermatocranium measures are moderately to strongly negative in *Fgfr2c*<sup>+/+</sup> littermates while  
 518 being strongly positive in *Fgfr2c*<sup>C342Y/+</sup> mice indicating pairs of measures that vary in opposite  
 519 directions in typically developing mice but that tend to increase (or decrease) jointly when the  
 520 *Fgfr2* variant is present ; and 2) correlations that are moderately positive in *Fgfr2c*<sup>+/+</sup> mice and  
 521 strongly negative in *Fgfr2c*<sup>C342Y/+</sup> mice describing relationships among chondrocranial and  
 522 dermatocranial measures that are of low to medium positive intensity in typically developing

523 mice but that vary strongly in opposite directions when the *Fgfr2* variant is present (Fig. 6A, Fig.  
524 6 – video 1).

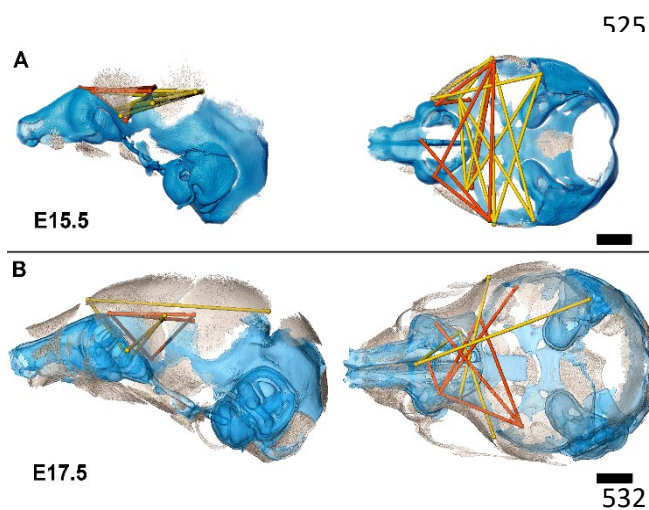

**Figure 6. Summary of statistically significant differences in morphological integration of dermatocranium and chondrocranium between genotypes.** (A) Linear distance pairs from the dermatocranium (yellow) and chondrocranium (orange) whose association is statistically stronger ( $\alpha = 0.10$ ) in *Fgfr2c*<sup>C342Y/+</sup> mice relative to *Fgfr2c*<sup>+/+</sup> mice at E15.5 and (B) at E17.5. Left lateral (at left) and superior (at right) views shown. Scalebars = 1 mm. Video of 3D reconstruction shown in this figure with line sets can be found in Fig. 6 – video 1 and Fig. 6 – video 2.

By E17.5, the lateral walls of the chondrocranium are dissolving as dermal bones mineralize and expand in size, and the mean association between the two modules decreases in *Fgfr2c*<sup>C342Y/+</sup> mice and increases slightly in *Fgfr2c*<sup>+/+</sup> mice yielding similar mean values between genotypes. The number of significant differences in correlations between dermatocranial and chondrocranial dimensions is reduced to 107 (24.3%) at E17.5 suggesting that the similar mean values are coupled with similar patterns of association between the two cranial

539 modules at this age. Of these significant differences, 57 (12.9%) of them indicate relationships  
540 between specific chondrocranium and dermatocranium measures that are mildly to strongly  
541 negative in *Fgfr2c*<sup>+/+</sup> mice but mildly to strongly positive in *Fgfr2c*<sup>C342Y/+</sup> mice (Fig. 6B, Fig. 6 –  
542 video 2), while 50 (11.3%) vary from mildly negative to strongly positive in *Fgfr2c*<sup>+/+</sup> mice but are  
543 moderately to strongly negative in *Fgfr2c*<sup>C342Y/+</sup> mice.

544

## 545 Discussion

546 We have provided an improved method for segmentation and visualization of embryonic  
547 cranial cartilage by PTA-enhanced microCT imaging and used these data to reveal local and  
548 global variations of chondrocranial morphology and its relationship to the dermatocranium in

549 mice carrying an *Fgfr2* variant that is associated with Crouzon syndrome. Our detailed  
550 observations of chondrocranial morphology over embryonic time demonstrate the direct effects  
551 of the *Fgfr2c* C342Y variant on cartilage via chondroblast dysregulation resulting in  
552 malformation of the chondrocranium. *Fgfr2c*<sup>C342Y/+</sup> mice have a greater amount of cartilage and  
553 a chondrocranium that is generally larger and differently shaped relative to their *Fgfr2c*<sup>+/+</sup>  
554 littermates at every embryonic age studied. The dermatocranial elements of *Fgfr2c*<sup>C342Y/+</sup> mice  
555 form on the ectocranial surfaces of cartilage and match the contours and shapes of associated  
556 chondrocranial elements contributing to a generally larger and dysmorphic embryonic  
557 dermatocranium. Data support our hypothesis that the prenatal development of the  
558 chondrocranium and dermatocranium is integrated with the relationship contributing to skull  
559 morphogenesis, and suggest that while the chondrocranium is present, its morphology  
560 influences the formation and growth of dermatocranial elements.

561 Our findings have significant implications for understanding the role of embryonic cranial  
562 cartilage in the initial formation, configuration, and development of cranial dermal bone.  
563 Functional explanations for the chondrocranium are appropriate because no modern vertebrate  
564 has lost this skeleton during evolution. The ability of cartilage to grow interstitially and by  
565 accretion means that the cranial endoskeleton, unlike the cranial dermoskeleton, can change  
566 shape dynamically during embryogenesis acting as a progressively transforming scaffold for  
567 developing dermal bone. The transient nature of the chondrocranium is one reason why so little  
568 is known about its role in craniofacial development and mouse models provide an ideal tool for  
569 addressing questions pertaining to its role in typical development, craniofacial disease, and  
570 potentially, evolution.

571 Craniosynostosis is a relatively common birth defect, second only to clefts of the lip and  
572 palate (Heuzé et al., 2014). Syndromes of Pfeiffer, Crouzon, Apert, Saethre-Chotzen, and  
573 Muenke comprise the most common of the FGFR-related craniosynostosis syndromes. Details  
574 of how the disease-associated genetic variants interrupt intracellular signaling is the focus of

575 much research, but how those changes contribute to the assembly of disease phenotypes has  
576 received less attention. For example, it is not known if midfacial retrusion, a complex trait  
577 involving cartilage, bone, and soft tissues of the face and jaws and shared by most individuals  
578 with FGFR-related craniosynostosis syndromes, is produced by similar processes in patients  
579 carrying different FGFR variants. Mouse models that recapitulate the genetic basis for, and  
580 phenotypic consequences of, specific FGFR variants provide an experimental system to expand  
581 our knowledge of the production of FGFR-related phenotypes. Most of the work with  
582 craniosynostosis-associated genetic variants have focused on the bony skull of mouse models  
583 for craniosynostosis, or on human cell lines to demonstrate how specific variants alter the  
584 processes of proliferation, differentiation, apoptosis, and/or polarity of osteoblast lineage cells as  
585 they differentiate. Exceptions include a study of *Fgfr2c*<sup>C342Y/C342Y</sup> mice suggesting that many  
586 phenotypic aberrations stem from a primary failure of mesenchymal condensation contributing  
587 to aberrant cartilage and bone (Peskett et al., 2017), observations of enhanced tracheal  
588 cartilage formation in *Fgfr2* mouse lines suggesting that abnormal chondrogenesis occurred  
589 (Lam et al., 2021; Wang et al., 2005), and studies that demonstrate cartilage-autonomous  
590 effects of *Fgfr2* variants on the septum nasi and other facial cartilages (Holmes et al., 2018; Kim  
591 et al., 2021). Holmes et al. (Holmes et al., 2018) found nasal cavity volume reduction and  
592 cartilage thickening to contribute significantly to the prenatal midface phenotype in two Apert  
593 syndrome mouse models (*Fgfr2*<sup>+S252W</sup> and *Fgfr2*<sup>+P253R</sup>) and the Crouzon mouse model used  
594 here, but that structural and cellular changes resulting in midfacial dysgenesis differ among  
595 specific *Fgfr2* variants. Kim et al (Kim et al., 2021) found increased septal chondrocyte  
596 hypertrophy and thickening of the septum nasi postnatally to contribute to midfacial deformities  
597 in septum nasi-associated structures using a mouse line carrying a chondrocyte specific *Fgfr2*  
598 S252W variant (*Col2a1-cre; Fgfr2S252W/+*). Both studies reveal midfacial dysgenesis in  
599 FGFR2-related craniosynostosis to be a complex phenotype arising from the combined effects  
600 of aberrant signaling in multiple craniofacial tissues including cartilage.

601 The chondrocrania of *Fgfr2c*<sup>C342Y/+</sup> Crouzon syndrome mice are composed of more and  
602 larger cartilage cells accompanied by more extracellular matrix, a finding consistent with the  
603 significantly larger size and increased thickness of their chondrocrania. This is the first  
604 demonstration that Fgf/Fgfr signaling directly affects chondrocranial shape through changes in  
605 chondrocyte characteristics contributing to the abnormal craniofacies of Crouzon syndrome.  
606 Mechanisms controlling the activity of chondrocytes in the identified developing regions of  
607 interest are multifaceted and time sensitive. Most instances of a significant increase in  
608 chondrocyte number, size, or matrix composition in *Fgfr2*<sup>+/+</sup> embryos can be directly associated  
609 with significant increase in other measures of chondrocyte and cartilage size in *Fgfr2*<sup>C342Y/+</sup>  
610 embryos at the same time; however, when this does not occur (e.g., matrix in braincase floor at  
611 E15.5, Figure 3O), it is possible that statistically insignificant changes in other cellular  
612 characteristics may have additive or interactive effects with biological significance that offsets  
613 the identified statistically significant increases identified in *Fgfr2*<sup>+/+</sup> embryos. The morphology of  
614 the chondrocranium is the result of independent, integrated, and potentially additive effects of  
615 dynamic changes at the cellular level. As cartilages of the chondrocranium form individually,  
616 appearing at different points of embryonic time and maturing according to their own  
617 developmental schedule, the *Fgfr2* variant may be affecting chondrocyte maturation and cell  
618 cycle differently across cartilages and within cartilage zones (e.g., proliferative, hypertrophic)  
619 such that an alternate approach to histological assessment is required.

620 The prenatal bony skulls of *Fgfr2c*<sup>C342Y/+</sup> mice are larger than those of their *Fgfr2c*<sup>+/+</sup>  
621 littermates, while skulls of adult *Fgfr2c*<sup>C342Y/+</sup> mice are relatively smaller with domed cranial  
622 vaults. These results reveal that a transformative change in skull morphology and growth  
623 dynamics occurs with disintegration of the transient chondrocranial cartilages, suggesting the  
624 significance of the cartilaginous scaffold to shapes of dermal bones and advance embryonic  
625 cranial cartilage as a potential therapeutic target for craniofacial disease.

626           While it is known that the *Fgfr2c* C342Y variant results in constitutive activation of the  
627 receptor associated with up-regulation of osteoblast proliferation, our results reveal that this  
628 variant directly targets the chondrocyte lineage. The *Fgfr2c* C342Y variant produces changes in  
629 chondrocyte size, chondrocyte number, cartilage extracellular matrix area, and size and shape  
630 of the chondrocranium prenatally that distinguish the genotypes, and indirectly influences  
631 prenatal dermatocranial element position, size, shape, and growth. The known regulatory  
632 effects on the osteoblast lineage may function at the cellular level prenatally but appear to direct  
633 the size and shape of forming dermal bone tissue differentially whether the chondrocranium is  
634 present (prenatally) or absent (postnatally). Once chondrocranial elements either disappear or  
635 mineralize endochondrally, size and shape of dermal bones begin transformations towards  
636 shapes seen in adult skulls. This suggests that the earliest dermal bone in *Fgfr2c*<sup>C342Y/+</sup> mice  
637 acts non-autonomously, in coordination with the variant's effects on chondrocytes. When  
638 chondrocytes of nearby cranial cartilages disappear however, dermal bone behaves  
639 autonomously.

640           Of the three main hypotheses we proposed to explain the relationship between  
641 chondrocranial cartilage and dermal bone formation, our results demonstrate that the *Fgfr2*  
642 variant affects the chondrocyte series and the osteoblast lineage and that the morphological  
643 effects of the variant emphasize integration of chondrocranial and dermatocranial development  
644 prenatally. Studies of morphological integration (MI) reveal an elevated magnitude of  
645 association between chondrocranium and dermatocranium of *Fgfr2c*<sup>C342Y/+</sup> mice at E15.5  
646 matching the results of previous analyses of *Fgfr2*<sup>+/S252W</sup> and *Fgfr2*<sup>+/P253R</sup> Apert syndrome mouse  
647 models at P0 (Martínez-Abadías et al., 2011) that suggested FGF/FGFR signaling as a  
648 covariance-generating process in skull development acting to modulate MI intensity. The  
649 physical and developmental aspect of this integration is mirrored in reduced MI intensity  
650 between chondrocranium and dermatocranium for both genotypes at E17.5 as portions of the  
651 chondrocrania begin to dissolve.

652           Our findings are relevant to various fields and challenge traditional thinking about the  
653 role of cartilage in the formation of dermal bone. While the association of cartilage is well  
654 defined for endochondral ossification, intramembranous ossification is commonly described as  
655 mineralization that proceeds ‘without a cartilaginous model’. Our data are the first to provide  
656 clear evidence of a developmental relationship between cartilaginous elements of the  
657 chondrocranium and bones of the dermatocranium. The combination of data presented here  
658 and elsewhere (Kawasaki and Richtsmeier, 2017a; Pitirri et al., 2020) demonstrates that these  
659 relationships underlie normal craniofacial development and dysmorphogenesis, and may offer a  
660 mechanistic explanation for the production of cranial variation across species, and even over  
661 evolutionary time. Our study supports the assertion that chondrocranial cartilages function as a  
662 scaffold, but also as a guide, significantly influencing the position, size, and shape of developing  
663 dermal bone. The relationship is temporary however and appears to diminish with the departure  
664 of transient cartilages, highlighting the critical, but fleeting impact of chondrocranial cartilage on  
665 dermal bone.

666

### 667 ***Ideas and Speculation***

668           Our findings hold significance for the fields of 3D imaging, craniofacial development,  
669 disease, and evolution. 3D reconstructions and visualizations of the two skeletal systems offer  
670 insightful views of little-known physical relationships that can aid in the formulation of functional  
671 hypotheses about the timing and emergent properties of neighboring cranial tissues. Our  
672 observations indicate a strong link between cranial cartilages and cranial dermal bone  
673 development, and it is likely that other genetic variants can affect the chondrocranium prior to  
674 mineralization of cranial bone. The evidence presented here of a relationship between the  
675 chondrocranium and dermatocranium advocates for a potential reassessment of the traditional  
676 definition of intramembranous ossification as a process that lacks any cartilage involvement.

677 In our example, it appears that the indirect effect of chondrocranial maldevelopment on  
678 dermal bone is physical or biomechanical and time sensitive as the relative size and shape of  
679 the bony skull of the two genotypes changes when the lateral walls of the chondrocranium break  
680 down. It is equally probably however that the chondrocranium-dermatocranium boundary  
681 functions as a signaling interface during normal craniofacial development. In typically  
682 developing mice the location of the coronal suture corresponds with, and may be predetermined  
683 by, the anterior edge of the tectum transversum (TTR) which is established as early as E13.5  
684 (Fig. 1C, Fig. 1 – supplemental Fig. 1; Fig. 2, Fig. 2 – supplemental figure 1), much earlier than  
685 mineralization of the frontal and parietal bones (Fig. 2). Osteoblasts destined to form the parietal  
686 bone do not differentiate rostral to the edge of the TTR in typically developing mice (Kawasaki  
687 and Richtsmeier, 2017a). As the lateral wall including the TTR shows significant changes in  
688 mice carrying the *Fgfr2c* C342Y variant, this boundary and its role in formation of the coronal  
689 suture might be altered when the variant is present.

690 It is not uncommon for researchers to report “ectopic” chondrocyte derived tissue in the  
691 study of craniofacial development and disease (e.g., (Bartoletti et al., 2020; He and Soriano,  
692 2017; Holmes and Basilico, 2012)). Although the chondrocranial changes we see in the  
693 *Fgfr2c*<sup>C342Y/+</sup> mice are ectopic in the sense that they are located “in an abnormal place or  
694 position”, future studies should distinguish between the effect of genetic variants on the size,  
695 shape, and position of typically developing chondrocranial cartilages and effects that cause  
696 novel cartilages to form in locations where cranial cartilage is not normally found. Truly ectopic  
697 cartilage may not have a tight link with dermal bone formation and such distinctions could be  
698 predictors of emerging craniofacial (dys)morphology.

699 Finally, our demonstration that the development of the chondrocranium and  
700 dermatocranium is integrated may not be limited to mouse development but could denote an  
701 evolutionary mechanism of vertebrate skull integrity. Though in our experience the relationship  
702 between specific chondrocranial cartilages and dermal bones is constant across mouse strains,



703 there exist interspecies differences in the cartilages that compose the chondrocranium (de Beer,  
 704 1937), and the association of chondrocranial elements with specific dermal bones varies over  
 705 time and across species. Some cartilages of the mouse chondrocranium are not present in  
 706 humans for example (Kawasaki and Richtsmeier, 2017a), and their function is most likely  
 707 assumed by an alternate cartilage. Historic works by de Beer, Starck, and Moore (de Beer,  
 708 1937; Moore, 1981; Starck, 1979) and contemporary works (e.g., Werneburg, 2020) provide  
 709 information on the incredible variation of chondrocranial morphology across mammals and  
 710 vertebrates. Though the link between the chondrocranium and dermatocranium is robust, the  
 711 association between the two skeletal systems appears to have the ability to vary and can  
 712 evolve, with the potential for differing signaling systems to direct these links in different species.  
 713

## 714 **Materials and Methods**

### 715 Sample

716 Mice were produced, sacrificed, and processed in compliance with animal welfare guidelines  
 717 approved by the Pennsylvania State University Animal Care and Use Committee (#46558).  
 718 Based upon timed mating and evidence of pregnancy, litters were sacrificed and collected as  
 719 appropriate (See Table 6 for sample sizes for specific analyses.). PTA staining, alizarin red, and  
 720 alcian blue staining were performed as previously described (Behringer et al., 2014; Lesciotto et  
 721 al., 2020).

722 **Table 6. Sample sizes of embryonic mice used in analyses.** Specimen matched bone and  
 723 phosphotungstic acid enhanced (PTA-e) scans were used for Morphological Integration (MI)  
 724 analysis.

| Age   | Genotype                     | Bone Scan                      |                          |                              | PTA Scan | MI | Histology |
|-------|------------------------------|--------------------------------|--------------------------|------------------------------|----------|----|-----------|
|       |                              | E15.5, E16.5,<br>E17.5<br>EDMA | E17.5, P0,<br>P2<br>EDMA | E17.5, P0<br>Bone<br>volumes |          |    |           |
| E13.5 | <i>Fgfr2c</i> <sup>+/+</sup> | 0                              | 0                        | 0                            | 3        | 0  | 4         |

|       |                                  |    |    |    |   |   |   |
|-------|----------------------------------|----|----|----|---|---|---|
|       | <i>Fgfr2c</i> <sup>C342Y/+</sup> | 0  | 0  | 0  | 3 | 0 | 4 |
| E14.5 | <i>Fgfr2c</i> <sup>+/+</sup>     | 0  | 0  | 0  | 5 | 0 | 7 |
|       | <i>Fgfr2c</i> <sup>C342Y/+</sup> | 0  | 0  | 0  | 5 | 0 | 7 |
| E15.5 | <i>Fgfr2c</i> <sup>+/+</sup>     | 7  | 0  | 0  | 5 | 5 | 6 |
|       | <i>Fgfr2c</i> <sup>C342Y/+</sup> | 4  | 0  | 0  | 4 | 4 | 6 |
| E16.5 | <i>Fgfr2c</i> <sup>+/+</sup>     | 7  | 0  | 0  | 5 | 0 | 6 |
|       | <i>Fgfr2c</i> <sup>C342Y/+</sup> | 7  | 0  | 0  | 5 | 0 | 5 |
| E17.5 | <i>Fgfr2c</i> <sup>+/+</sup>     | 13 | 31 | 13 | 5 | 5 | 4 |
|       | <i>Fgfr2c</i> <sup>C342Y/+</sup> | 13 | 18 | 14 | 5 | 5 | 5 |
| P0    | <i>Fgfr2c</i> <sup>+/+</sup>     | 0  | 11 | 10 | 0 | 0 | 0 |
|       | <i>Fgfr2c</i> <sup>C342Y/+</sup> | 0  | 11 | 10 | 0 | 0 | 0 |
| P2    | <i>Fgfr2c</i> <sup>+/+</sup>     | 0  | 13 | 0  | 0 | 0 | 0 |
|       | <i>Fgfr2c</i> <sup>C342Y/+</sup> | 0  | 16 | 0  | 0 | 0 | 0 |

725

## 726 Imaging Protocols

727 MicroCT images for bone and PTA-enhanced (PTA-e) microCT images for soft tissue analyses

728 were acquired by the Center for Quantitative Imaging at the Pennsylvania State University

729 ([www.cqi.psu.edu](http://www.cqi.psu.edu)) using the General Electric v|tom|x L300 nano/microCT system. This is a

730 dual-tube system with a 300-kV microfocus tube for larger specimens and a 180-kV nanofocus

731 tube for smaller specimens. Although specimens may be scanned using either tube, we found

732 the greatest resolution and scan quality were typically produced by the 180-kV tube for

733 embryonic specimens and the 300-kV tube for postnatal specimens. Image data were

734 reconstructed on a 2024 × 2024 pixel grid as a 32-bit volume but may be reduced to 16-bit

735 volume for image analysis using Avizo 2020.2 (ThermoFisher Scientific, Waltham, MA).

736 Scanning parameters varied from 60-100 kV and 75-170 μA, to accommodate age group and

737 type of scan performed. Voxel sizes ranged from 6.9 to 15 microns (μm) for bone scans and 4.5

738 to 8 μm for PTA-e scans.

## 739 **Data Collection**

### 740 Segmentation of bone

741 A hydroxy apatite (HA) bone phantom was included alongside specimens being scanned for  
742 bone. A minimum threshold of 70-100 mg/cm<sup>3</sup> partial density HA was used to reconstruct bony  
743 isosurfaces in Avizo 2020.2. Data were passed through a median filter to remove noise and the  
744 Volume Edit tool of Avizo was used to remove any material not part of the skull. Specific bone  
745 volumes were determined using the Material Statistics module of Avizo. Bone volumes were  
746 compared between *Fgfr2c*<sup>C342Y/+</sup> mice and *Fgfr2c*<sup>+/+</sup> littermates in IBM SPSS 25 software (IBM,  
747 Armonk, NY) using non-parametric Mann-Whitney U tests due to violations of assumptions of  
748 homogeneity or variance and/or normality. Following bone volume measurement, 3D  
749 isosurfaces were compacted to 1,000,000 faces each in the Simplification Editor of Avizo  
750 2020.2 prior to landmarking.

### 751 Segmentation of embryonic cartilage

752 We previously reported an automatic deep learning based chondrocranium segmentation  
753 approach (Zheng et al., 2020). Although deep learning based fully convolutional networks  
754 (FCNs) have achieved great successes on both generic and biomedical image segmentation  
755 (Long et al., 2015; Ronneberger et al., 2015; Zheng et al., 2019), segmenting chondrocrania in  
756 3D micro-CT images remains a very challenging task. Due to high difficulty in labeling  
757 complicated objects (embryonic cranial cartilage) in large 3D micro-CT images to provide  
758 sufficient training data for deep learning model training, we must resort to sparse annotation  
759 (i.e., labeling only a very small subset of 2D slices in the training set of whole 3D volumes) for  
760 training our 3D segmentation model, while still enabling our model to segment the unseen whole  
761 volumes (including the delicate and detailed ROIs) with good accuracy. To this end, we  
762 developed a new, two-phase approach: (1) automatically segmenting the majority of the  
763 chondrocranium with very sparse annotation performed by experts in anatomy that bridges the

764 performance gap compared with full annotation; (2) integrating limited human corrections to  
765 fine-tune the model. We present a high-level description of our approach below.

766 (1) Automatic chondrocranium segmentation with very sparse annotation via uncertainty-  
767 guided self-training. Manual annotation was performed by experts using Avizo 2020.2  
768 (ThermoFisher Scientific, Waltham, MA). We started with selecting a very sparse subset of 2D  
769 slices (e.g., 2%–10%) for annotation that represents and covers the unannotated slices of the  
770 whole training volumes well. We then used the annotated slices to train a judiciously designed  
771 K-head FCN to predict pseudo-labels (PLs) in the unannotated slices of the training volumes  
772 (for bridging the spatial annotation gap) as well as compute the associated uncertainty maps of  
773 the PLs (which quantify the pixel-wise prediction confidence or uncertainty). Guided by the  
774 uncertainty, we iteratively trained the FCN with PLs and improved its generalization ability in  
775 unseen volumes. Moreover, we integrated the segmentation results along three orthogonal  
776 planes to further boost the segmentation performance via ensemble learning. Experimental  
777 results showed that our approach achieves average Dice scores of 87% and 83% in the training  
778 and unseen (test) volumes, respectively, with only 3% annotation of the slices in the training  
779 volumes. More details of our approach and validations can be found in (Zheng et al., 2020).

780 (2) Model fine-tuning via human-aided corrections. The automatic segmentation  
781 accuracy in the first phase on extremely difficult ROIs (e.g., Meckel's cartilage and cranial vault)  
782 may still not meet the requirement of quantitative analysis, because the model's generalizability  
783 is constrained by the highly sparse annotation and the unbalanced amounts of training pixels  
784 between easy and difficult regions. Hence, we first evaluated the inadequately segmented  
785 regions and manually corrected the algorithm-generated predictions, and then combined the  
786 annotations thus obtained and PLs to further fine-tune our segmentation model. This process  
787 did not incur too much computational costs. Consequently, most specimens were segmented  
788 almost perfectly by our model, except for extremely thin, small, or ambiguous regions in certain

789 specimens. Finally, we manually corrected these local errors to generate an accurate  
790 chondrocranium model for quantitative analysis.

#### 791 Landmark data

792 Three dimensional coordinates of biologically relevant landmarks were collected from slices and  
793 isosurfaces created from microCT images of the specimens using Avizo 2020.2 (ThermoFisher  
794 Scientific, Waltham, MA). Specimens were digitized twice by the same observer, checked and  
795 corrected for any gross error, and measurement error was minimized by averaging the  
796 coordinates of the two trials. A maximum of 5% error in landmark placement was accepted.  
797 Table 1 and Table 3 provide anatomical definitions of all landmarks used. Further information on  
798 landmark data can be found at <https://getahead.la.psu.edu/landmarks/>

#### 799 Suture patency

800 We scored patterns of suture patency as visualized on HR $\mu$ CT images for the coronal suture  
801 and three facial sutures in each mouse assigning qualitative scores of open, partially open, or  
802 fused to the entire length of the sutures using previously published protocols (Motch Perrine et  
803 al., 2014). These observations were used to show the relationship of suture patency patterns  
804 and craniofacial shape in both genotypes from E17.5 – P2 (Fig. 4).

805

### 806 **Statistical Analyses**

#### 807 Morphological comparison of embryonic cranial cartilage and bone

808 To statistically determine shape differences between groups, we used EDMA (Lele and  
809 Richtsmeier, 2001, 1995). EDMA converts 3D landmark data into a matrix of all possible linear  
810 distances between unique landmark pairs and tests for statistical significance of differences  
811 between shapes using a boot-strapped hypothesis testing procedure and non-parametric  
812 bootstrapped confidence intervals. We used subsets of landmarks representing various  
813 anatomical regions to test for morphological differences of the nasal capsule, lateral walls, and  
814 braincase floor of the chondrocranium and the bony skull of *Fgfr2c*<sup>C342Y/+</sup> and *Fgfr2c*<sup>+/+</sup> mice. Use

815 of these subsets in the evaluation of regional shape differences was done to bring the sample  
816 size closer to the number of landmarks considered for statistical testing. Significant differences  
817 of specific linear distances are evaluated by a 90% confidence interval produced through a non-  
818 parametric bootstrapping procedure (Lele and Richtsmeier, 1995). Rejection of the null  
819 hypothesis of similarity for linear distances enables localization of differences to specific  
820 dimensions. EDMA analyses were performed using WinEDMA (University of Missouri-Kansas  
821 City, Kansas City, MO),(Cole III, 2002b) and EDMAinR (University of Alberta, Edmonton,  
822 Canada) (Solymos et al., 2021).

### 823 Principal components analysis of form

824 Ontogenetic variation in skull shapes were assessed using principal components analysis  
825 (PCA). To assess form (size and shape), all inter-landmark distances were *ln*-transformed and  
826 their variance-covariance matrix was used as the basis for the PCA (Motch Perrine et al., 2014).  
827 The amount of variation due to form is the sum of the variances for all of the *ln*-transformed  
828 linear measurements. All PCA were performed using SAS 9.4 (SAS Institute, Cary, NC). We  
829 scored suture patency separately (described above) and coded specimens in the PCA plot  
830 according to suture patency (Fig. 4)

### 831 Morphological integration

832 Though there are many methods to test hypotheses of cranial integration estimated using matrix  
833 correlations and/or covariances, here, we study integration within the chondrocranium, within  
834 the dermatocranium (excluding any landmarks on endochondral skull bones), and between the  
835 chondrocranium and dermatocranium. To avoid the use of superimposition when estimating  
836 correlation/covariance among traits and differences in these patterns, we use linear distances  
837 estimated from 3D coordinate locations of biological landmarks (Richtsmeier et al., 2006). The  
838 use of linear distances also circumvents the affine registration (a mapping that includes three  
839 translations, three rotations, three scales, and three shears) required to register data from  
840 microCT skull images and PTA-e microCT chondrocranial images.

841 Our analysis provides information about how typical integration of chondrocranium and  
842 dermatocranium is altered in the presence of craniosynostosis-associated variants by  
843 statistically comparing patterns of correlation/covariance in *Fgfr2c*<sup>C342Y/+</sup> embryos and *Fgfr2c*<sup>+/+</sup>  
844 littermates using a previously published method (Motch Perrine et al., 2017; Richtsmeier et al.,  
845 2006). To statistically compare patterns of MI between genotypes we used a boot-strap based  
846 method (Cole III and Lele, 2002; Richtsmeier et al., 2006) implemented in MIBoot (University of  
847 Missouri-Kansas City, Kansas City, MO), a Windows-based software package (Cole III, 2002b).  
848 3D coordinates of 7 dermatocranial landmarks and 7 chondrocranial landmarks (see Table 3  
849 and Table 1) recorded from microCT and PTA-e microCT images, respectively, were used to  
850 estimate a total of 861 linear measures (42 unique linear distances among landmarks located  
851 on the dermatocranium and 42 unique linear distances estimated between chondrocranial  
852 landmarks) that were used in analysis. Within each age group, for each sample, a  
853 correlation/covariance matrix was estimated for unique linear distances pairs and a correlation  
854 difference matrix was estimated by subtracting the elements of the correlation matrix estimated  
855 for the *Fgfr2c*<sup>C342Y/+</sup> sample from the corresponding elements of the matrix estimated for the  
856 *Fgfr2c*<sup>+/+</sup> sample. If the correlation matrices are the same for two samples, then the correlation-  
857 difference matrix consists of zeros. If they are not similar, each element of the correlation  
858 difference matrix is statistically evaluated using a nonparametric bootstrap approach to estimate  
859 confidence intervals ( $\alpha = 0.10$ ). If a confidence interval does not include zero (the expected  
860 value under the null hypothesis of similarity), then the null hypothesis of similar associations for  
861 that linear distance pair is rejected. Using this method, we statistically compared the correlation  
862 patterns within the dermatocranium, within the chondrocranium, and between the  
863 dermatocranium and chondrocranium for *Fgfr2c*<sup>C342Y/+</sup> Crouzon syndrome mice and *Fgfr2c*<sup>+/+</sup>  
864 littermates at E15.5 and E17.5.

865 Histology

866 Randomly selected specimen per age and genotype were labeled to conceal genotype, fixed  
867 overnight in 4% paraformaldehyde, processed for paraffin-based histology per standard  
868 protocol, serially sectioned at 7  $\mu\text{m}$  using a manual rotary microtome, stained according to  
869 standard safranin-o staining protocol, and imaged using Leica BX50 microscope, DFC450  
870 camera, and LAS-X x-y scanning imaging software (Leica Biosystems, Allendale, NJ). Regions  
871 of interest stained with safranin-o were identified and analyzed using Image-J color  
872 deconvolution and masks to count stained areas by color (Purple=nuclei, Orange=Cartilage  
873 matrix). Image files were labeled as to blind the investigator to the genotype of the specimen. At  
874 least 3 images were measured per region per individual (See Table 6 for n). Non-parametric  
875 Mann-Whitney U tests were used to compare genotypes at each age in SPSS 25 software (IBM,  
876 Armock, NY) as there were violations of assumptions of homogeneity of variance and/or  
877 normality.

#### 878 **Data Availability**

879 Data have been posted on ScholarSphere at:

880 <https://scholarsphere.psu.edu/resources/44387e59-0aa7-40f7-9e2b-af4606f5fbac>;

881 doi:10.26207/qgke-r185. Data available includes: three-dimensional reconstructions of the  
882 chondrocranium for one *Fgfr2c*<sup>C342Y/+</sup> and one *Fgfr2c*<sup>+/+</sup> specimen at E13.5, E14.5, E15.5, E16.5,  
883 and E17.5, microCT images for bone and PTA-enhanced specimens, histological images and  
884 spreadsheets, 3D coordinates of landmark data taken on skulls, dermatocrania, and  
885 chondrocrania, bone volumes per specimen, linear distances used for morphological integration,  
886 linear distance based PCA, shape eigenvalues, and suture scoring for global landmark analysis  
887 of shape of E17.5, P0, and P2 specimens and creation of PCA plots. Information on how to  
888 download the WinEDMA programs can be found at <https://getahead.la.psu.edu/resources/edma>  
889 and the EDMAinR programs are available on github (<https://github.com/psolymos/EDMAinR>).  
890 Code for automatic chondrocranium segmentation with very sparse annotation via uncertainty-  
891 guided self-training will be available through [https://github.com/ndcse-medical/CartSeg\\_UGST](https://github.com/ndcse-medical/CartSeg_UGST).



892 PTA-e staining protocols for various embryonic ages of mice are available at

893 <https://doi.org/10.1002/dvdy.136>

## 894 **Acknowledgements**

895 The authors wish to extend their gratitude to the staff at the Pennsylvania State University

896 Center for Quantitative Imaging (<https://iee.psu.edu/labs/center-quantitative-imaging>) for

897 production of excellent quality images used in this study and Talia Pankratz Connell for

898 assistance in image preparation. This research was supported in part by NICHD/NIH

899 P01HD078233 and NIDCR/NIH R01 DE027677, R01 DE031439, and NSF CCF-1617735.

900

## 901 **References Cited**

902 Bartoletti G, Dong C, Umar M, He F. 2020. Pdgfra regulates multipotent cell differentiation towards  
903 chondrocytes via inhibiting Wnt9a/beta-catenin pathway during chondrocranial cartilage  
904 development. *Developmental Biology* **466**:36–46. doi:10.1016/j.ydbio.2020.08.004

905 Behringer R, Gertsenstein M, Nagy K. 2014. Manipulating the mouse embryo: a laboratory manual. Cold  
906 Spring Harbor: Cold Spring Harbor Laboratory Press.

907 Breur GJ, Vanenkevort BA, Farnum CE, Wilsman NJ. 1991. Linear relationship between the volume of  
908 hypertrophic chondrocytes and the rate of longitudinal bone growth in growth plates. *J Orthop*  
909 *Res* **9**:348–359. doi:10.1002/jor.1100090306

910 Carroll SB. 2001. Chance and necessity: the evolution of morphological complexity and diversity. *Nature*  
911 **409**:1102–1109. doi:10.1038/35059227

912 Chernoff B, Magwene P. 1999. Afterword. In: Olson E, Miller R, editors. Morphological  
913 integration. Morphological Integration. Chicago: University of Chicago. pp. 319–348.

914 Cole III TM. 2002a. MIBoot Windows-based software for bootstrap-based comparison of morphological  
915 integration patterns. Kansas City: U of Missouri-Kansas City School of Medicine.

916 Cole III TM. 2002b. WinEDMA: Software Euclidean Distance Matrix Analysis Version 1.0.1 beta. Kansas  
917 City Univ. Missouri – Kansas City Sch. Med.

918 Cole III TM, Lele S. 2002. Bootstrap-based methods for comparing morphological integration patterns.  
919 *American Journal Physical Anthropology* **34(Suppl)**:55.

920 Cooper KL, Oh S, Sung Y, Dasari RR, Kirschner MW, Tabin CJ. 2013. Multiple phases of chondrocyte  
921 enlargement underlie differences in skeletal proportions. *Nature* **495**:375–378.  
922 doi:10.1038/nature11940

923 Cuellar A, Bala K, Di Pietro L, Barba M, Yagnik G, Liu JL, Stevens C, Hur DJ, Ingersoll RG, Justice CM, Drissi  
924 H, Kim J, Lattanzi W, Boyadjiev SA. 2020. Gain-of-function variants and overexpression of RUNX2  
925 in patients with nonsyndromic midline craniosynostosis. *Bone* **137**:115395.  
926 doi:10.1016/j.bone.2020.115395

927 de Beer G. 1937. Development of the vertebrate skull. Oxford: Oxford University Press.

928 Eswarakumar VP, Horowitz MC, Locklin R, Morriss-Kay GM, Lonai P. 2004. A gain-of-function mutation of  
929 Fgfr2c demonstrates the roles of this receptor variant in osteogenesis. *PNAS* **101**:12555–12560.  
930 doi:10.1073/pnas.0405031101

- 931 Eswarakumar VP, Monsonogo-Ornan E, Pines M, Antonopoulou I, Morriss-Kay GM, Lonai P. 2002. The  
932 Il1c alternative of Fgfr2 is a positive regulator of bone formation. *Development* **129**:3783–3793.
- 933 Farmer DT, Mlcochova H, Zhou Y, Koelling N, Wang G, Ashley N, Bugacov H, Chen H-J, Parvez R, Tseng K-  
934 C, Merrill AE, Maxson RE, Wilkie AOM, Crump JG, Twigg SRF. 2021. The developing mouse  
935 coronal suture at single-cell resolution. *Nat Commun* **12**:4797. doi:10.1038/s41467-021-24917-9
- 936 Flaherty K, Richtsmeier J. 2018. It's about time: ossification center formation in C57BL/6 mice from E12–  
937 E16. *JDB* **6**:31. doi:10.3390/jdb6040031
- 938 Flaherty K, Singh N, Richtsmeier JT. 2016. Understanding craniosynostosis as a growth disorder. *Wiley*  
939 *Interdisciplinary Reviews: Developmental Biology* **5**:429–459. doi:10.1002/wdev.227
- 940 Genomics England Research Consortium, Calpena E, Cuellar A, Bala K, Swagemakers SMA, Koelling N,  
941 McGowan SJ, Phipps JM, Balasubramanian M, Cunningham ML, Douzougou S, Lattanzi W, Morton  
942 JEV, Shears D, Weber A, Wilson LC, Lord H, Lester T, Johnson D, Wall SA, Twigg SRF, Mathijssen  
943 IMJ, Boardman-Pretty F, Boyadjiev SA, Wilkie AOM. 2020. SMAD6 variants in craniosynostosis:  
944 genotype and phenotype evaluation. *Genet Med* **22**:1498–1506. doi:10.1038/s41436-020-0817-  
945 2
- 946 Goos JAC, Mathijssen IMJ. 2019. Genetic Causes of Craniosynostosis: An Update. *Mol Syndromol* **10**:6–  
947 23. doi:10.1159/000492266
- 948 Hallgrímsson B, Jamniczky H, Young NM, Rolian C, Parsons TE, Boughner JC, Marcucio RS. 2009.  
949 Deciphering the Palimpsest: Studying the Relationship Between Morphological Integration and  
950 Phenotypic Covariation. *Evol Biol* **36**:355–376. doi:10.1007/s11692-009-9076-5
- 951 He F, Soriano P. 2017. Deregulated PDGFR $\alpha$  signaling alters coronal suture morphogenesis and leads to  
952 craniosynostosis through endochondral ossification. *Development* dev.151068.  
953 doi:10.1242/dev.151068
- 954 Heuzé Y, Holmes G, Peter I, Richtsmeier JT, Jabs EW. 2014. Closing the gap: Genetic and genomic  
955 continuum from syndromic to nonsyndromic craniosynostoses. *Current genetic medicine reports*  
956 **2**:135–145. doi:10.1007/s40142-014-0042-x
- 957 Hirasawa T, Kuratani S. 2015. Evolution of the vertebrate skeleton: morphology, embryology, and  
958 development. *Zoological Lett* **1**:2. doi:10.1186/s40851-014-0007-7
- 959 Holmes G, Basilico C. 2012. Mesodermal expression of Fgfr2S252W is necessary and sufficient to induce  
960 craniosynostosis in a mouse model of Apert syndrome. *Developmental Biology* **368**:283–293.  
961 doi:10.1016/j.ydbio.2012.05.026
- 962 Holmes G, Gonzalez-Reiche AS, Saturne M, Motch Perrine SM, Zhou X, Borges AC, Shewale B,  
963 Richtsmeier JT, Zhang B, van Bakel H, Jabs EW. 2021. Single-cell analysis identifies a key role for  
964 Hhip in murine coronal suture development. *Nat Commun* **12**:7132. doi:10.1038/s41467-021-  
965 27402-5
- 966 Holmes G, O'Rourke C, Perrine SMM, Lu N, Bakel H van, Richtsmeier JT, Jabs EW. 2018. Midface and  
967 upper airway dysgenesis in FGFR2-related craniosynostosis involves multiple tissue-specific and  
968 cell cycle effects. *Development* **145**:dev166488. doi:10.1242/dev.166488
- 969 Iseki S, Wilkie AOM, Heath JK, Ishimaru T, Eto K, Morriss-Kay GM. 1997. Fgfr2 and osteopontin domains  
970 in the developing skull vault are mutually exclusive and can be altered by locally applied FGF2.  
971 *Development* **124**:3375–3384.
- 972 Janvier P. 2015. Facts and fancies about early fossil chordates and vertebrates. *Nature* **520**:483–489.  
973 doi:10.1038/nature14437
- 974 Janvier P. 1993. Patterns of diversity in the skull of jawless fishes The Skull Volume 2: Patterns of  
975 Structural and Systematic Diversity. Chicago: University of Chicago. pp. 131–188.
- 976 Jarvik E. 1980. Basic structure and evolution of vertebrates. New York: Academic Press.
- 977 Johnson D, Wilkie AOM. 2011. Craniosynostosis. *Eur J Hum Genet* **19**:369–376.  
978 doi:10.1038/ejhg.2010.235

- 979 Justice CM, Yagnik G, Kim Y, Peter I, Jabs EW, Erazo M, Ye X, Ainehsazan E, Shi L, Cunningham ML,  
980 Kimonis V, Roscioli T, Wall SA, Wilkie AOM, Stoler J, Richtsmeier JT, Heuzé Y, Sanchez-Lara PA,  
981 Buckley MF, Druschel CM, Mills JL, Caggana M, Romitti PA, Kay DM, Senders C, Taub PJ, Klein  
982 OD, Boggan J, Zwienenberg-Lee M, Naydenov C, Kim J, Wilson AF, Boyadjiev SA. 2012. A  
983 genome-wide association study identifies susceptibility loci for nonsyndromic sagittal  
984 craniosynostosis near BMP2 and within BBS9. *Nat Genet* **44**:1360–1364. doi:10.1038/ng.2463
- 985 Kaucka M, Zikmund T, Tesarova M, Gyllborg D, Hellander A, Jaros J, Kaiser J, Petersen J, Szarowska B,  
986 Newton PT, Dyachuk V, Li L, Qian H, Johansson A-S, Mishina Y, Currie JD, Tanaka EM, Erickson A,  
987 Dudley A, Brismar H, Southam P, Coen E, Chen M, Weinstein LS, Hampl A, Arenas E, Chagin AS,  
988 Fried K, Adameyko I. 2017. Oriented clonal cell dynamics enables accurate growth and shaping  
989 of vertebrate cartilage. *eLife* **6**:e25902. doi:10.7554/eLife.25902
- 990 Kawasaki K, Richtsmeier J. 2017a. Association of the chondrocranium and dermatocranium in early skull  
991 development In: Percival C, Richtsmeier J, editors. Building Bones: Early Bone Development  
992 Informing Anthropological Inquiry, Cambridge Studies in Biological and Evolutionary  
993 Anthropology. Cambridge, England: Cambridge University Press. pp. 52–78.
- 994 Kawasaki K, Richtsmeier J. 2017b. Appendix to Chapter 3 In: Percival C, Richtsmeier J, editors. Building  
995 Bones: Bone Formation and Development in Anthropology, Cambridge Studies in Biological and  
996 Evolutionary Anthropology. Cambridge, England: Cambridge University Press. pp. 303–315.
- 997 Lajeunie E, Heuertz S, El Ghouzi V, Martinovic J, Renier D, Le Merrer M, Bonaventure J. 2006. Mutation  
998 screening in patients with syndromic craniosynostoses indicates that a limited number of  
999 recurrent FGFR2 mutations accounts for severe forms of Pfeiffer syndrome. *Eur J Hum Genet*  
1000 **14**:289–298.
- 1001 Lam AS, Liu CC, Deutsch GH, Rivera J, Perkins JA, Holmes G, Jabs EW, Cunningham ML, Dahl JP. 2021.  
1002 Genotype–Phenotype Correlation of Tracheal Cartilaginous Sleeves and *Fgfr2* Mutations in Mice.  
1003 *The Laryngoscope* **131**. doi:10.1002/lary.29060
- 1004 Lele S, Richtsmeier JT. 2001. An invariant approach to statistical analysis of shapes, Interdisciplinary  
1005 statistics. Boca Raton, FL: Chapman & Hall/CRC.
- 1006 Lele S, Richtsmeier JT. 1995. Euclidean distance matrix analysis: Confidence intervals for form and  
1007 growth differences. *American Journal of Physical Anthropology* **98**:73–86.  
1008 doi:10.1002/ajpa.1330980107
- 1009 Lesciotto KM, Motch Perrine SM, Kawasaki M, Stecko T, Ryan TM, Kawasaki K, Richtsmeier JT. 2020.  
1010 Phosphotungstic acid-enhanced microCT: Optimized protocols for embryonic and early  
1011 postnatal mice. *Dev Dynam* **249**:573–585. doi:10.1002/dvdy.136
- 1012 Liu J, Kwon T-G, Nam HK, Hatch NE. 2013. Craniosynostosis-Associated *Fgfr2*<sup>C342Y</sup> Mutant Bone Marrow  
1013 Stromal Cells Exhibit Cell Autonomous Abnormalities in Osteoblast Differentiation and Bone  
1014 Formation. *BioMed Research International* **2013**:1–11. doi:10.1155/2013/292506
- 1015 Long J, Shelhamer E, Darrell T. 2015. Fully convolutional networks for semantic segmentation 2015 IEEE  
1016 Conference on Computer Vision and Pattern Recognition (CVPR). Presented at the 2015 IEEE  
1017 Conference on Computer Vision and Pattern Recognition (CVPR). Boston, MA, USA: IEEE. pp.  
1018 3431–3440. doi:10.1109/CVPR.2015.7298965
- 1019 Martínez-Abadías N, Heuzé Y, Wang Y, Jabs EW, Aldridge K, Richtsmeier JT. 2011. FGF/FGFR Signaling  
1020 Coordinates Skull Development by Modulating Magnitude of Morphological Integration:  
1021 Evidence from Apert Syndrome Mouse Models. *PLoS ONE* **6**:e26425.  
1022 doi:10.1371/journal.pone.0026425
- 1023 Martínez-Abadías N, Motch SM, Pankratz TL, Wang Y, Aldridge K, Jabs EW, Richtsmeier JT. 2013. Tissue-  
1024 specific responses to aberrant FGF signaling in complex head phenotypes. *Dev Dynam* **242**:80–  
1025 94. doi:10.1002/dvdy.23903

- 1026 Maruyama T, Jeong J, Sheu T-J, Hsu W. 2016. Stem cells of the suture mesenchyme in craniofacial bone  
1027 development, repair and regeneration. *Nat Commun* **7**:10526. doi:10.1038/ncomms10526
- 1028 Maruyama T, Stevens R, Boka A, DiRienzo L, Chang C, Yu H-MI, Nishimori K, Morrison C, Hsu W. 2021.  
1029 BMPR1A maintains skeletal stem cell properties in craniofacial development and  
1030 craniosynostosis. *Sci Transl Med* **13**:eabb4416. doi:10.1126/scitranslmed.abb4416
- 1031 Miraoui H, Oudina K, Petite H, Tanimoto Y, Moriyama K, Marie PJ. 2009. Fibroblast Growth Factor  
1032 Receptor 2 Promotes Osteogenic Differentiation in Mesenchymal Cells via ERK1/2 and Protein  
1033 Kinase C Signaling. *Journal of Biological Chemistry* **284**:4897–4904.  
1034 doi:10.1074/jbc.M805432200
- 1035 Moore W. 1981. The mammalian skull. New York, NY: Cambridge University Press.
- 1036 Motch Perrine SM, Cole TM, Martínez-Abadías N, Aldridge K, Jabs EW, Richtsmeier JT. 2014. Craniofacial  
1037 divergence by distinct prenatal growth patterns in Fgfr2 mutant mice. *BMC Developmental*  
1038 *Biology* **14**:8. doi:10.1186/1471-213X-14-8
- 1039 Motch Perrine SM, Stecko T, Neuberger T, Jabs EW, Ryan TM, Richtsmeier JT. 2017. Integration of brain  
1040 and skull in prenatal mouse models of Apert and Crouzon syndromes. *Frontiers in Human*  
1041 *Neuroscience* **11**:369. doi:10.3389/fnhum.2017.00369
- 1042 Oldridge M, Wilkie AOM, Slaney SF, Poole MD, Pulleyn LJ, Rutland P, Hockley AD, Wake MJC, Goldin JH,  
1043 Winter RM, Reardon W, Malcolm S. 1995. Mutations in the third immunoglobulin domain of the  
1044 fibroblast growth factor receptor-2 gene in Crouzon syndrome. *Hum Mol Genet* **4**:1077–1082.  
1045 doi:10.1093/hmg/4.6.1077
- 1046 Olson E, Miller R. 1958. Morphological integration. Chicago: University of Chicago.
- 1047 Opperman LA. 2000. Cranial sutures as intramembranous bone growth sites. *Dev Dyn* **219**:472–485.  
1048 doi:10.1002/1097-0177(2000)9999:9999::AID-DVDY1073>3.0.CO;2-F
- 1049 Park S, Zhao H, Urata M, Chai Y. 2016. Sutures Possess Strong Regenerative Capacity for Calvarial Bone  
1050 Injury. *Stem Cells and Development* **25**:1801–1807. doi:10.1089/scd.2016.0211
- 1051 Patterson. 1977. Cartilage bones, dermal bone and membrane bones, or the exoskeleton versus  
1052 endoskeleton Problems in Vertebrate Evolution. New York, NY: Academic Press. pp. 77–121.
- 1053 Perlyn CA, DeLeon VB, Babbs C, Govier D, Burell L, Darvann T, Kreiborg S, Morriss-Kay G. 2006. The  
1054 Craniofacial Phenotype of the Crouzon Mouse: Analysis of a Model for Syndromic  
1055 Craniosynostosis Using Three-Dimensional MicroCT. *The Cleft Palate-Craniofacial Journal*  
1056 **43**:740–747. doi:10.1597/05-212
- 1057 Peskett E, Kumar S, Baird W, Jaiswal J, Li M, Patel P, Britto JA, Pauws E. 2017. Analysis of the *Fgfr2*<sup>C342Y</sup>  
1058 mouse model shows condensation defects due to misregulation of *Sox9* expression in  
1059 prechondrocytic mesenchyme. *Biology Open* **6**:223–231. doi:10.1242/bio.022178
- 1060 Pitirri MK, Kawasaki K, Richtsmeier JT. 2020. It takes two: Building the vertebrate skull from  
1061 chondrocranium and dermatocranium. *Vertebrate Zoology* **70**:587–600. doi:10.26049/VZ70-4-  
1062 2020-04
- 1063 Reardon W, Winter RM, Rutland P, Pulleyn LJ, Jones BM, Malcolm S. 1994. Mutations in the fibroblast  
1064 growth factor receptor 2 gene cause Crouzon syndrome. *Nat Genet* **8**:98–103.  
1065 doi:10.1038/ng0994-98
- 1066 Richtsmeier JT, Aldridge K, DeLeon VB, Panchal J, Kane AA, Marsh JL, Yan P, Cole TM. 2006. Phenotypic  
1067 integration of neurocranium and brain. *J Exp Zool Part B* **306B**:360–378. doi:10.1002/jez.b.21092
- 1068 Ronneberger O, Fischer P, Brox T. 2015. U-Net: Convolutional Networks for Biomedical Image  
1069 Segmentation. *arXiv:150504597 [cs]*.
- 1070 Rutland P, Pulleyn LJ, Reardon W, Baraitser M, Hayward R, Jones B, Malcolm S, Winter RM, Oldridge M,  
1071 Slaney SF, Poole MD, Wilkie AOM. 1995. Identical mutations in the FGFR2 gene cause both  
1072 Pfeiffer and Crouzon syndrome phenotypes. *Nat Genet* **9**:173–176. doi:10.1038/ng0295-173

- 1073 Sansom I, Andreev P. 2019. The Ordovician Enigma: Fish, first appearances and phylogenetic  
1074 controversies *Evolution and Development of Fishes*. Cambridge: Cambridge University Press. pp.  
1075 59–86.
- 1076 Schultze H-P. 1993. Patterns of diversity in the skull of jawed fishes *The Skull: Patterns of Structural and*  
1077 *Systematic Diversity*. University of Chicago Press: Chicago. pp. 189–254.
- 1078 Snyder-Warwick AK, Perlyn CA, Pan J, Yu K, Zhang L, Ornitz DM. 2010. Analysis of a gain-of-function  
1079 FGFR2 Crouzon mutation provides evidence of loss of function activity in the etiology of cleft  
1080 palate. *Proceedings of the National Academy of Sciences* **107**:2515–2520.  
1081 doi:10.1073/pnas.0913985107
- 1082 Solymos P, Lele S, Cole T III, Hu L, Richtsmeier J. 2021. EDMAinR: Euclidean Distance Matrix Analysis in R.  
1083 Starck D. 1979. *Vergleichende Anatomie der Wirbeltiere auf evolutionsbiologischer Grundlage*. New York,  
1084 NY: Springer.
- 1085 Wang Y, Xiao R, Yang F, Karim B, Iacovelli AJ, Cai J, Lerner CP, Richtsmeier JT, Leszl J, Hill CA, Yu K, Ornitz  
1086 DM, Elisseeff J, Huso DL, Jabs EW. 2005. Abnormalities in cartilage and bone development in the  
1087 Apert syndrome FGFR2+/S252W mouse. *Development* **132**:3537–3548. doi:10.1242/dev.01914
- 1088 Weiss KM. 2005. The phenogenetic logic of life. *Nat Rev Genet* **6**:36–45. doi:10.1038/nrg1502
- 1089 Werneburg I. 2020. Editorial to the Special Issue (Virtual Issue) 2019/2020 – Recent Advances in  
1090 Chondrocranium Research. doi:10.26049/VZ-69-70-SPECIAL-ISSUE
- 1091 Wilkie A. 1997. Craniosynostosis: genes and mechanisms. *Hum Mol Genet* **6**:1647–1656.  
1092 doi:10.1093/hmg/6.10.1647
- 1093 Wilkie A, Morriss-Kay G, Radcliffe J, Ox O. 2001. Genetics of craniofacial development and malformation.  
1094 *Nature Reviews Genetics* **2**:458–468.
- 1095 Wilsman NJ, Bernardini ES, Leiferman E, Noonan K, Farnum CE. 2008. Age and pattern of the onset of  
1096 differential growth among growth plates in rats. *J Orthop Res* **26**:1457–1465.  
1097 doi:10.1002/jor.20547
- 1098 Yu M, Ma L, Yuan Y, Ye X, Montagne A, He J, Ho T-V, Wu Y, Zhao Z, Sta Maria N, Jacobs R, Urata M, Wang  
1099 H, Zlokovic BV, Chen J-F, Chai Y. 2021. Cranial Suture Regeneration Mitigates Skull and  
1100 Neurocognitive Defects in Craniosynostosis. *Cell* **184**:243-256.e18.  
1101 doi:10.1016/j.cell.2020.11.037
- 1102 Zhao H, Feng J, Ho TV, Grimes W, Urata M, Chai Y. 2015. The suture provides a niche for mesenchymal  
1103 stem cells of craniofacial bones. *Nature Cell Biology* **17**:386–396. doi:10.1038/ncb3139
- 1104 Zheng H, Perrine SMM, Pitirri MK, Kawasaki K, Wang C, Richtsmeier JT, Chen DZ. 2020. Cartilage  
1105 Segmentation in High-Resolution 3D Micro-CT Images via Uncertainty-Guided Self-training with  
1106 Very Sparse Annotation. *Med Image Comput Comput Assist Interv* **12261**:802–812.  
1107 doi:10.1007/978-3-030-59710-8\_78
- 1108 Zheng H, Yang L, Han J, Zhang Y, Liang P, Zhao Z, Wang C, Chen DZ. 2019. HFA-Net: 3D Cardiovascular  
1109 Image Segmentation with Asymmetrical Pooling and Content-Aware Fusion In: Shen D, Liu T,  
1110 Peters TM, Staib LH, Essert C, Zhou S, Yap P-T, Khan A, editors. *Medical Image Computing and*  
1111 *Computer Assisted Intervention – MICCAI 2019, Lecture Notes in Computer Science*. Cham:  
1112 Springer International Publishing. pp. 759–767. doi:10.1007/978-3-030-32245-8\_84
- 1113 Zhu M, Yu X, Ahlberg PE, Choo B, Lu J, Qiao T, Qu Q, Zhao W, Jia L, Blom H, Zhu Y. 2013. A Silurian  
1114 placoderm with osteichthyan-like marginal jaw bones. *Nature* **502**:188–193.  
1115 doi:10.1038/nature12617

1117 **Figure supplement and video legends**

1118 **Figure 1 – Supplemental figure 1:** Comparison of the *Fgfr2c*<sup>C342Y/+</sup> (**A**, lateral and **B**, superior  
1119 views) and *Fgfr2c*<sup>+/+</sup> (**C**, lateral and **D**, superior views) mouse embryonic chondrocranium at  
1120 E13.5 segmented from PTA-enhanced microCT images. Specific areas of interest include the  
1121 ala orbitalis (AO), sphenethmoid commissure (CSE), otic capsule (OC), parietal plate (PP),  
1122 septum nasi (SN), tectum nasi (TN), orbitoparietal commissure (COP), and tectum transversum  
1123 (TTR) cartilages. Note that the CSE and AO are present in the *Fgfr2c*<sup>C342Y/+</sup> mouse but have not  
1124 yet developed in the *Fgfr2c*<sup>+/+</sup> mouse at E13.5. Scale bar = 1mm.

1125 **Figure 1 - Supplemental figure 2:** Comparison of the *Fgfr2c*<sup>C342Y/+</sup> (**A**, lateral and **B**, superior  
1126 views) and *Fgfr2c*<sup>+/+</sup> (**C**, lateral and **D**, superior views) mouse embryonic chondrocranium at  
1127 E14.5. Specific areas of interest include the ala orbitalis (AO), sphenethmoid commissure  
1128 (CSE), otic capsule (OC), parietal plate (PP), septum nasi (SN), tectum nasi (TN),  
1129 orbitoparietal commissure (COP), and tectum transversum (TTR) cartilages. AO, TTR, and COP  
1130 appear more developed in the *Fgfr2c*<sup>C342Y/+</sup> mouse relative to the *Fgfr2c*<sup>+/+</sup> mouse with a thick  
1131 band of cartilage joining AO with TTR. Scale bar = 1mm.

1132 **Figure 1 - Supplemental figure 3:** Comparison of the *Fgfr2c*<sup>C342Y/+</sup> (**A**, lateral and **B**, superior  
1133 views) and *Fgfr2c*<sup>+/+</sup> (**C**, lateral and **D**, superior views) mouse embryonic chondrocranium at  
1134 E15.5. Specific areas of interest include the ala orbitalis (AO), sphenethmoid commissure  
1135 (CSE), otic capsule (OC), parietal plate (PP), septum nasi (SN), tectum nasi (TN),  
1136 orbitoparietal commissure (COP), and tectum transversum (TTR) cartilages. Note the more  
1137 robust AO, TTR, and COP in the *Fgfr2c*<sup>C342Y/+</sup> mouse relative to the *Fgfr2c*<sup>+/+</sup> mouse with a thick  
1138 band of cartilage joining AO with TTR. Scale bar = 1mm.

1139 **Figure 1 - Supplemental figure 4:** Comparison of the *Fgfr2c*<sup>C342Y/+</sup> (**A**, lateral and **B**, superior  
1140 views) and *Fgfr2c*<sup>+/+</sup> (**C**, lateral and **D**, superior views) mouse embryonic chondrocranium at  
1141 E16.5. Specific areas of interest include the ala orbitalis (AO), sphenethmoid commissure  
1142 (CSE), otic capsule (OC), parietal plate (PP), septum nasi (SN), tectum nasi (TN),  
1143 orbitoparietal commissure (COP), and tectum transversum (TTR) cartilages. The  
1144 chondrocranium of the *Fgfr2c*<sup>C342Y/+</sup> mouse is more robust with an especially expanded AO,  
1145 TTR, and COP in the *Fgfr2c*<sup>C342Y/+</sup> mouse relative to the *Fgfr2c*<sup>+/+</sup> mouse. Scale bar = 1mm.

1146 **Figure 1 - Supplemental figure 5:** Comparison of the *Fgfr2c*<sup>C342Y/+</sup> (**A**, lateral and **B**, superior  
1147 views) and *Fgfr2c*<sup>+/+</sup> (**C**, lateral and **D**, superior views) mouse embryonic chondrocranium at  
1148 E17.5. The *Fgfr2c*<sup>C342Y/+</sup> chondrocranium is relatively larger by the naked eye by this age.  
1149 Specific areas of interest include the ala orbitalis (AO), sphenethmoid commissure (CSE), otic  
1150 capsule (OC), parietal plate (PP), septum nasi (SN), tectum nasi (TN),  
1151 orbitoparietal commissure (COP), and tectum transversum (TTR) cartilages. By this time, some  
1152 cartilages of the lateral wall are disappearing but AO, TTR, and COP remain relatively robust in  
1153 the *Fgfr2c*<sup>C342Y/+</sup> mouse relative to the *Fgfr2c*<sup>+/+</sup> mouse. Scale bar = 1mm.

1154 **Legend for Figure 1 – video 1.** Three-dimensional reconstruction of the isosurface of an E15.5  
1155 *Fgfr2c*<sup>+/+</sup> mouse chondrocranium.

1156 **Legend for Figure 1 – video 2.** Three-dimensional reconstruction of the superimposed  
1157 isosurfaces of an E15.5 *Fgfr2c*<sup>+/+</sup> mouse chondrocranium and skull.

1158 **Figure 2 - Supplemental figure 1:** Thickness maps of the chondrocranium of mice segmented  
1159 from PTA-enhanced microCT images (A, B) and cleared and stained specimens (C, D) at  
1160 E13.5. Colormaps of *Fgfr2c*<sup>C342Y/+</sup> (**A**) and *Fgfr2c*<sup>+/+</sup> (**B**) chondrocrania in lateral view, segmented

1161 from PTA-enhanced microCT images indicate cartilage thicknesses that ranged from just over 0  
1162  $\mu\text{m}$  (dark blue) to nearly 9  $\mu\text{m}$  (dark red). *Fgfr2c*<sup>C342Y/+</sup> (C) and *Fgfr2c*<sup>+/+</sup> (D) specimens that were  
1163 chemically cleared and stained with Alcian blue indicating proteoglycans in cartilage and alizarin  
1164 red indicating calcium containing osteocytes. Cartilaginous structures of interest include the ala  
1165 orbitalis (AO), sphenethmoid commissure (CSE), otic capsule (OC), parietal plate (PP), septum  
1166 nasi (SN), tectum nasi (TN), orbitoparietal commissure (COP), and tectum transversum (TTR).  
1167 Note that the CSE and AO are present in the *Fgfr2c*<sup>C342Y/+</sup> embryo but have not yet developed in  
1168 the *Fgfr2c*<sup>+/+</sup> embryo at E13.5. No osteocyte containing bone is shown in either genotype at this  
1169 age. Scalebar = 1 mm.

1170 **Figure 2 - Supplemental figure 2:** Thickness maps of the chondrocranium of mice segmented  
1171 from PTA-enhanced microCT images (A, B) and cleared and stained specimens (C, D) at  
1172 E14.5. Colormaps of *Fgfr2c*<sup>C342Y/+</sup> (A) and *Fgfr2c*<sup>+/+</sup> (B) chondrocrania in lateral view, segmented  
1173 from PTA-enhanced microCT images indicate cartilage thicknesses that ranged from just over 0  
1174  $\mu\text{m}$  (dark blue) to nearly 9  $\mu\text{m}$  (dark red). Comparable areas of cartilage development in  
1175 identified in *Fgfr2c*<sup>C342Y/+</sup> (C) and *Fgfr2c*<sup>+/+</sup> (D) specimens that were chemically cleared and  
1176 stained with Alcian blue indicating proteoglycans in cartilage. Developing bone is shown using  
1177 alizarin red staining indicating calcium containing osteocytes. Specific cartilages of interest  
1178 include the ala orbitalis (AO), sphenethmoid commissure (CSE), otic capsule (OC), parietal  
1179 plate (PP), septum nasi (SN), tectum nasi (TN), orbitoparietal commissure (COP), and tectum  
1180 transversum (TTR) cartilages. Note the more developed AO, TTR, and COP in the *Fgfr2c*<sup>C342Y/+</sup>  
1181 mouse relative to the *Fgfr2c*<sup>+/+</sup> mouse. The frontal (FR) and parietal (PR) bones are separated  
1182 by a presumptive coronal suture (CS) in the *Fgfr2c*<sup>+/+</sup> specimen (D), but there is no comparable  
1183 separation of the frontal and parietal bones in the *Fgfr2c*<sup>C342Y/+</sup> mouse (C) suggesting a lack of  
1184 suture formation. Scalebar = 1 mm.

1185 **Figure 2 - Supplemental figure 3:** Thickness maps of the chondrocranium of mice segmented  
1186 from PTA-enhanced microCT images (A, B) and cleared and stained specimens (C, D) at  
1187 E15.5. Colormaps of *Fgfr2c*<sup>C342Y/+</sup> (A) and *Fgfr2c*<sup>+/+</sup> (B) chondrocrania in lateral view, segmented  
1188 from PTA-enhanced microCT images indicate cartilage thicknesses that ranged from just over 0  
1189  $\mu\text{m}$  (dark blue) to nearly 9  $\mu\text{m}$  (dark red). Thickness maps show larger, thicker AO, TTR, and  
1190 COP in the *Fgfr2c*<sup>C342Y/+</sup> mouse relative to the *Fgfr2c*<sup>+/+</sup> mouse. *Fgfr2c*<sup>C342Y/+</sup> (C) and *Fgfr2c*<sup>+/+</sup> (D)  
1191 specimens that were chemically cleared and stained with Alcian blue indicating proteoglycans in  
1192 cartilage and alizarin red indicating calcium containing osteocytes indicate a large degree of  
1193 dermal bone formation between E14.5 and E15.5. Most of the anterior cartilages (ala orbitalis  
1194 (AO), sphenethmoid commissure (CSE) septum nasi (SN), tectum nasi (TN),  
1195 orbitoparietal commissure (COP), and tectum transversum (TTR) cartilages) are covered by  
1196 dermal bone. The otic capsule (OC) and parietal plate (PP) remain visible In these specimens,  
1197 the frontal (FR) and parietal (PR) bones are separated by the coronal suture (CS) in both  
1198 genotypes (C, D). Scalebar = 1 mm.

1199 **Figure 2 - Supplemental figure 4:** Thickness maps of the chondrocranium of mice segmented  
1200 from PTA-enhanced microCT images (A, B) and cleared and stained specimens (C, D) at  
1201 E16.5. Colormaps of *Fgfr2c*<sup>C342Y/+</sup> (A) and *Fgfr2c*<sup>+/+</sup> (B) chondrocrania in lateral view, segmented  
1202 from PTA-enhanced microCT images indicate cartilage thicknesses that ranged from just over 0  
1203  $\mu\text{m}$  (dark blue) to nearly 9  $\mu\text{m}$  (dark red). The entire chondrocranium of *Fgfr2c*<sup>C342Y/+</sup> embryos is  
1204 relatively robust with the tectum nasi (TN), ala orbitalis (AO), and tectum transversum (TTR)  
1205 showing obvious thickness differences between genotypes. *Fgfr2c*<sup>C342Y/+</sup> (C) and *Fgfr2c*<sup>+/+</sup> (D)

1206 specimens that were chemically cleared and stained with Alcian blue indicating proteoglycans in  
1207 cartilage and alizarin red indicating calcium containing osteocytes. The frontal (FR) and parietal  
1208 (PR) bones are separated by the coronal suture (CS) in the *Fgfr2c*<sup>+/+</sup> specimen (D), but the  
1209 suture is obliterated in the *Fgfr2c*<sup>C342Y/+</sup> mouse (C). The interparietal bone has formed in both  
1210 genotypes. Scalebar = 1 mm.

1211 **Figure 2 - Supplemental figure 5:** Thickness maps of the chondrocranium of mice segmented  
1212 from PTA-enhanced microCT images (A, B) and cleared and stained specimens (C, D) at  
1213 E17.5. Colormaps of *Fgfr2c*<sup>C342Y/+</sup> (A) and *Fgfr2c*<sup>+/+</sup> (B) chondrocrania in lateral view, segmented  
1214 from PTA-enhanced microCT images indicate cartilage thicknesses that ranged from just over 0  
1215  $\mu\text{m}$  (dark blue) to nearly 9  $\mu\text{m}$  (dark red). Though the chondrocranium is beginning to dissolve in  
1216 both genotypes, this process appears to be more advanced in *Fgfr2c*<sup>C342Y/+</sup> embryos, with the  
1217 AO and TTR becoming noticeably thin. *Fgfr2c*<sup>C342Y/+</sup> (C) and *Fgfr2c*<sup>+/+</sup> (D) specimens that were  
1218 chemically cleared and stained with Alcian blue indicating proteoglycans in cartilage and alizarin  
1219 red indicating calcium containing osteocytes. At this age, it is difficult to distinguish separate  
1220 cartilages and bones in cleared and stained specimens. However, frontal (FR) and parietal (PR)  
1221 bones are separated by the coronal suture (CS) in the *Fgfr2c*<sup>+/+</sup> specimen (D), and there is no  
1222 suture in the *Fgfr2c*<sup>C342Y/+</sup> embryo (C). Scalebar = 1 mm.

1223 **Figure 3 – video 1:** Three-dimensional reconstruction of the superimposed isosurfaces of an  
1224 E15.5 *Fgfr2c*<sup>+/+</sup> mouse chondrocranium and skull with blue lines depicting linear distances that  
1225 are significantly larger in *Fgfr2c*<sup>C342Y/+</sup> mice as compared to *Fgfr2c*<sup>+/+</sup> mice; fuchsia lines are  
1226 significantly reduced in *Fgfr2c*<sup>C342Y/+</sup> mice as compared to *Fgfr2c*<sup>+/+</sup> mice.

1227 **Figure 3 – video 2:** Three-dimensional reconstruction of the superimposed isosurfaces of an  
1228 E17.5 *Fgfr2c*<sup>+/+</sup> mouse chondrocranium and skull with blue lines depicting linear distances that  
1229 are significantly larger in *Fgfr2c*<sup>C342Y/+</sup> mice as compared to *Fgfr2c*<sup>+/+</sup> mice; fuchsia lines are  
1230 significantly reduced in *Fgfr2c*<sup>C342Y/+</sup> mice as compared to *Fgfr2c*<sup>+/+</sup> mice.

1231 **Figure 6 – video 1:** Three-dimensional reconstruction of the superimposed isosurfaces of an  
1232 E15.5 *Fgfr2c*<sup>+/+</sup> mouse chondrocranium and skull with linear distance pairs from the  
1233 dermatocranium (yellow) and chondrocranium (orange) whose association is statistically  
1234 stronger ( $\alpha = 0.10$ ) in *Fgfr2c*<sup>C342Y/+</sup> mice relative to *Fgfr2c*<sup>+/+</sup> mice.

1235 **Figure 6 – video 2:** Three-dimensional reconstruction of the superimposed isosurfaces of an  
1236 E17.5 *Fgfr2c*<sup>+/+</sup> mouse chondrocranium and skull with linear distance pairs from the  
1237 dermatocranium (yellow) and chondrocranium (orange) whose association is statistically  
1238 stronger ( $\alpha = 0.10$ ) in *Fgfr2c*<sup>C342Y/+</sup> mice relative to *Fgfr2c*<sup>+/+</sup> mice.
